# Supplementary material for: Identification and Validation of a m5C RNA Modification-Related Gene Signature for Predicting Prognosis and Immunotherapeutic Efficiency of Gastric Cancer
Source: Hindawi journal article supplement (doi:10.1155/2023/9931419), 2023-03-08

Validation set Survival curve

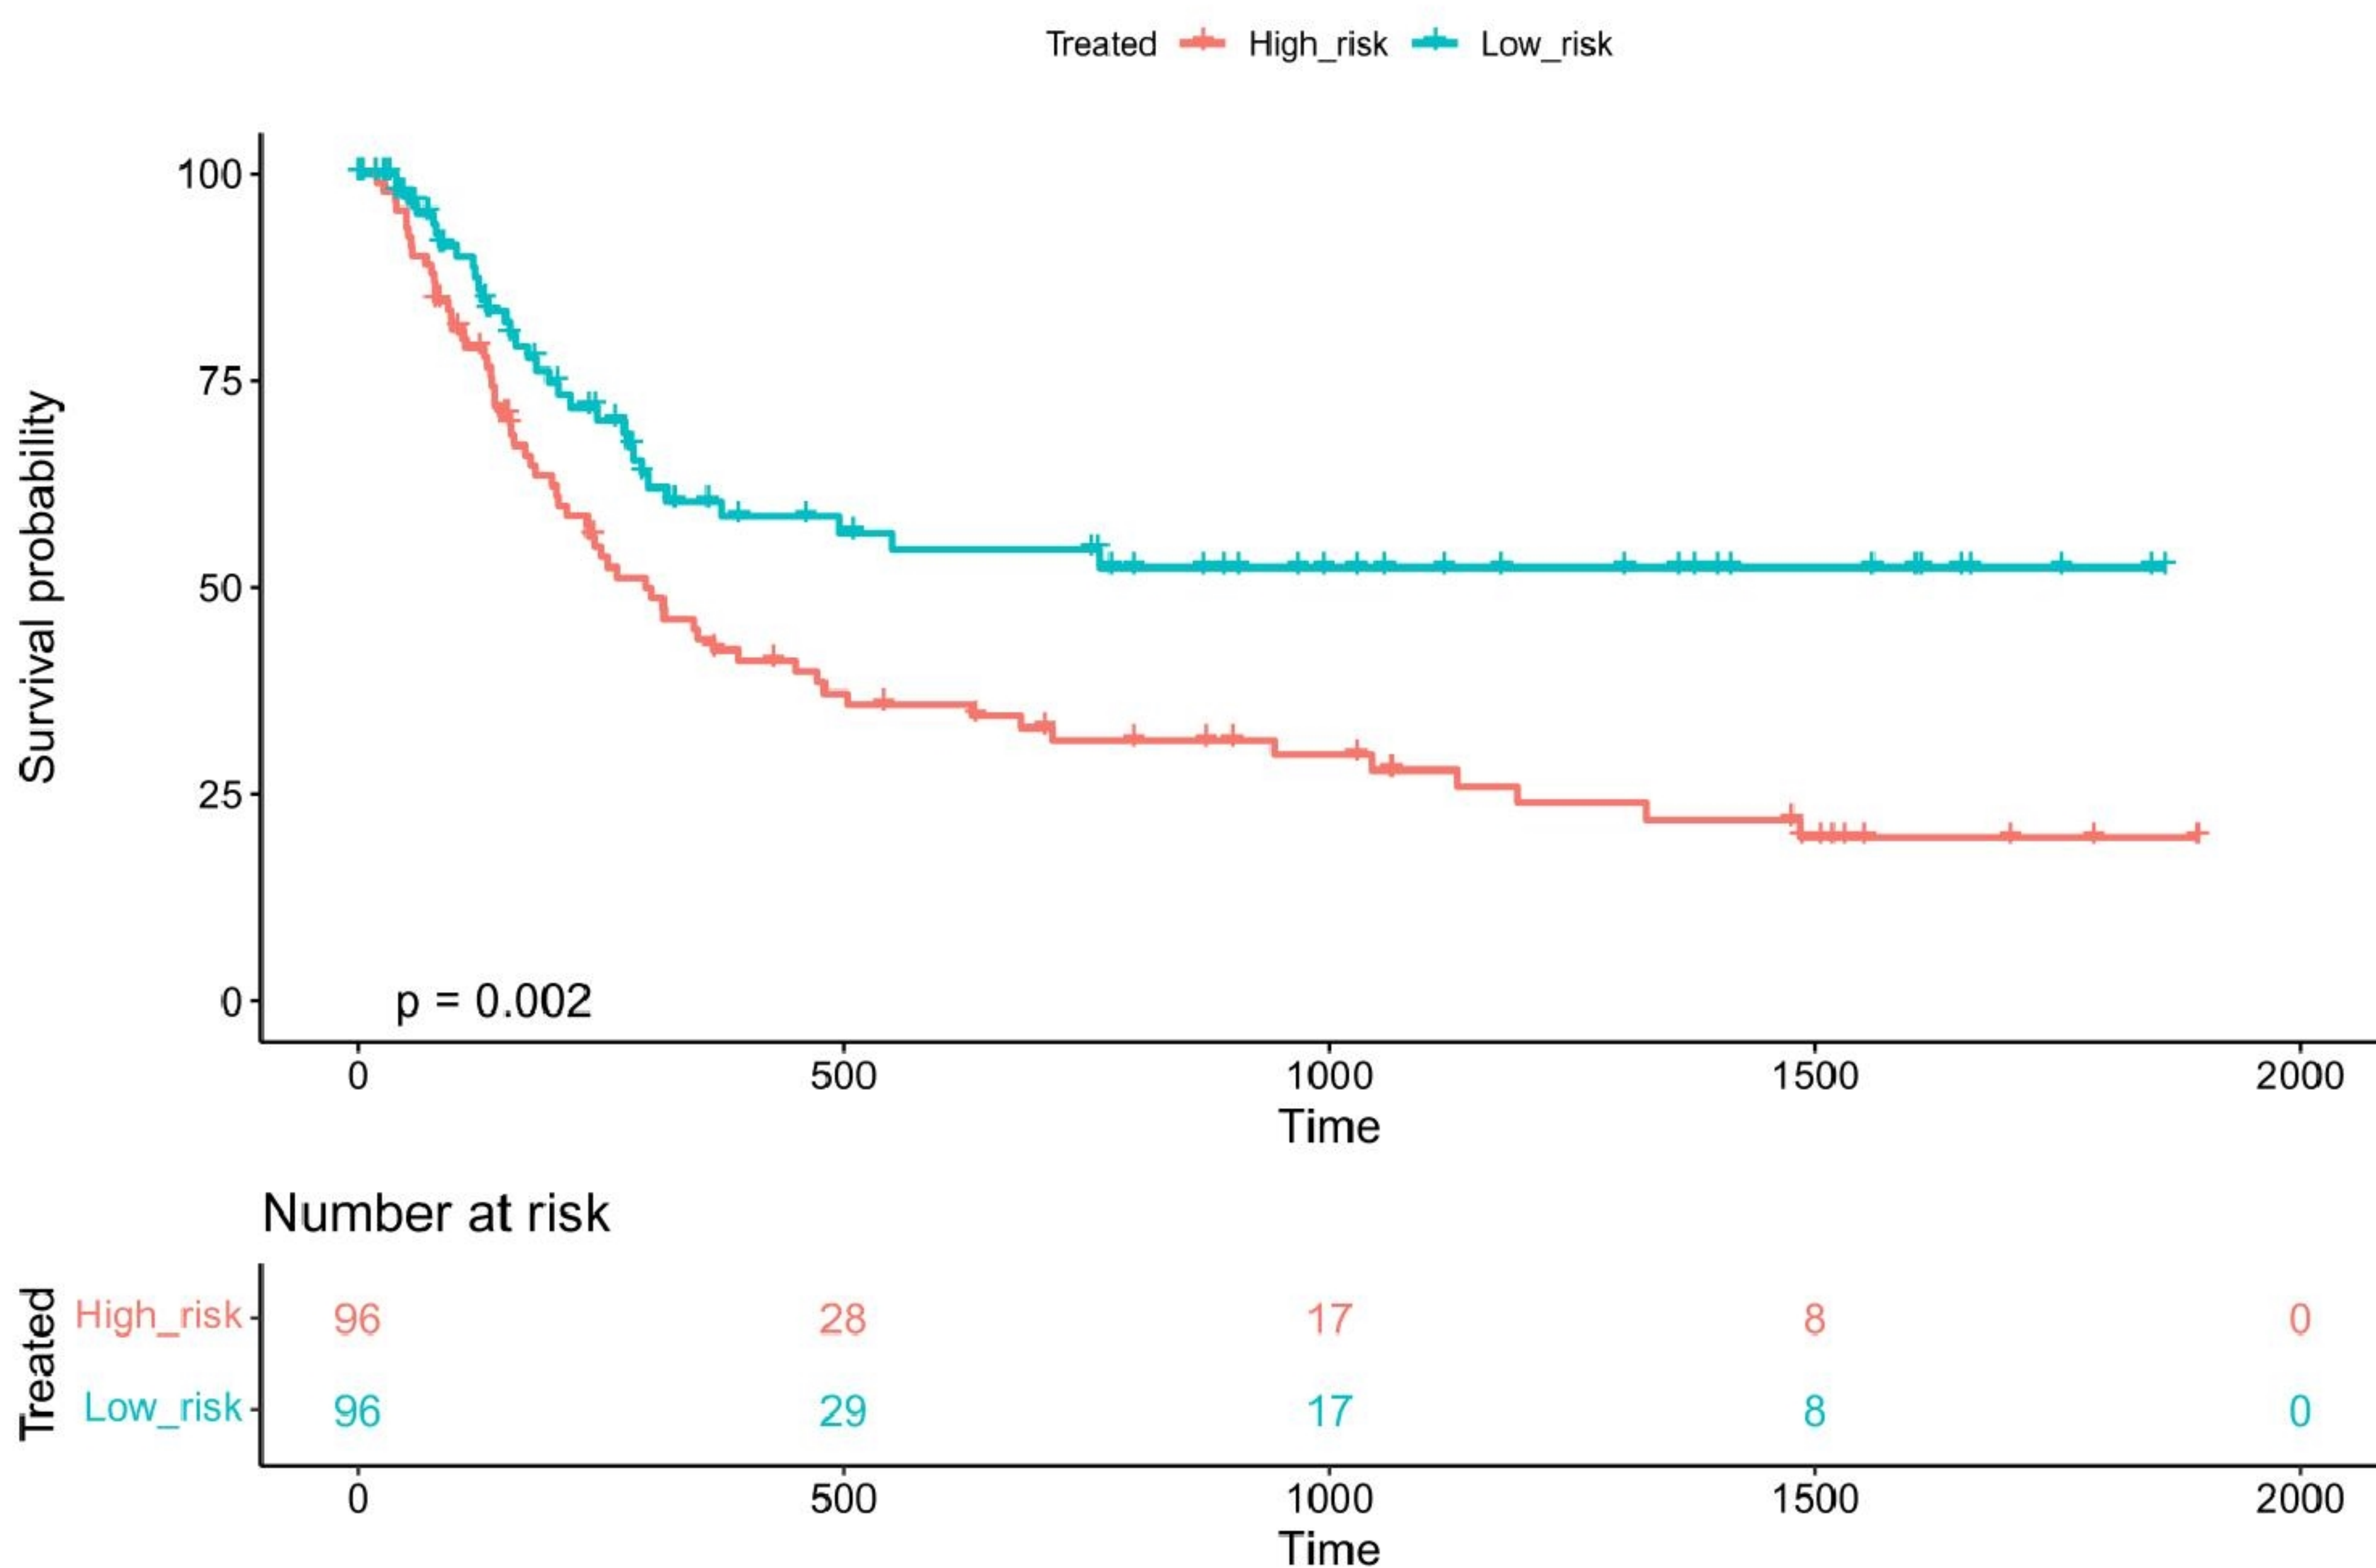

SurvivalROC for Test set

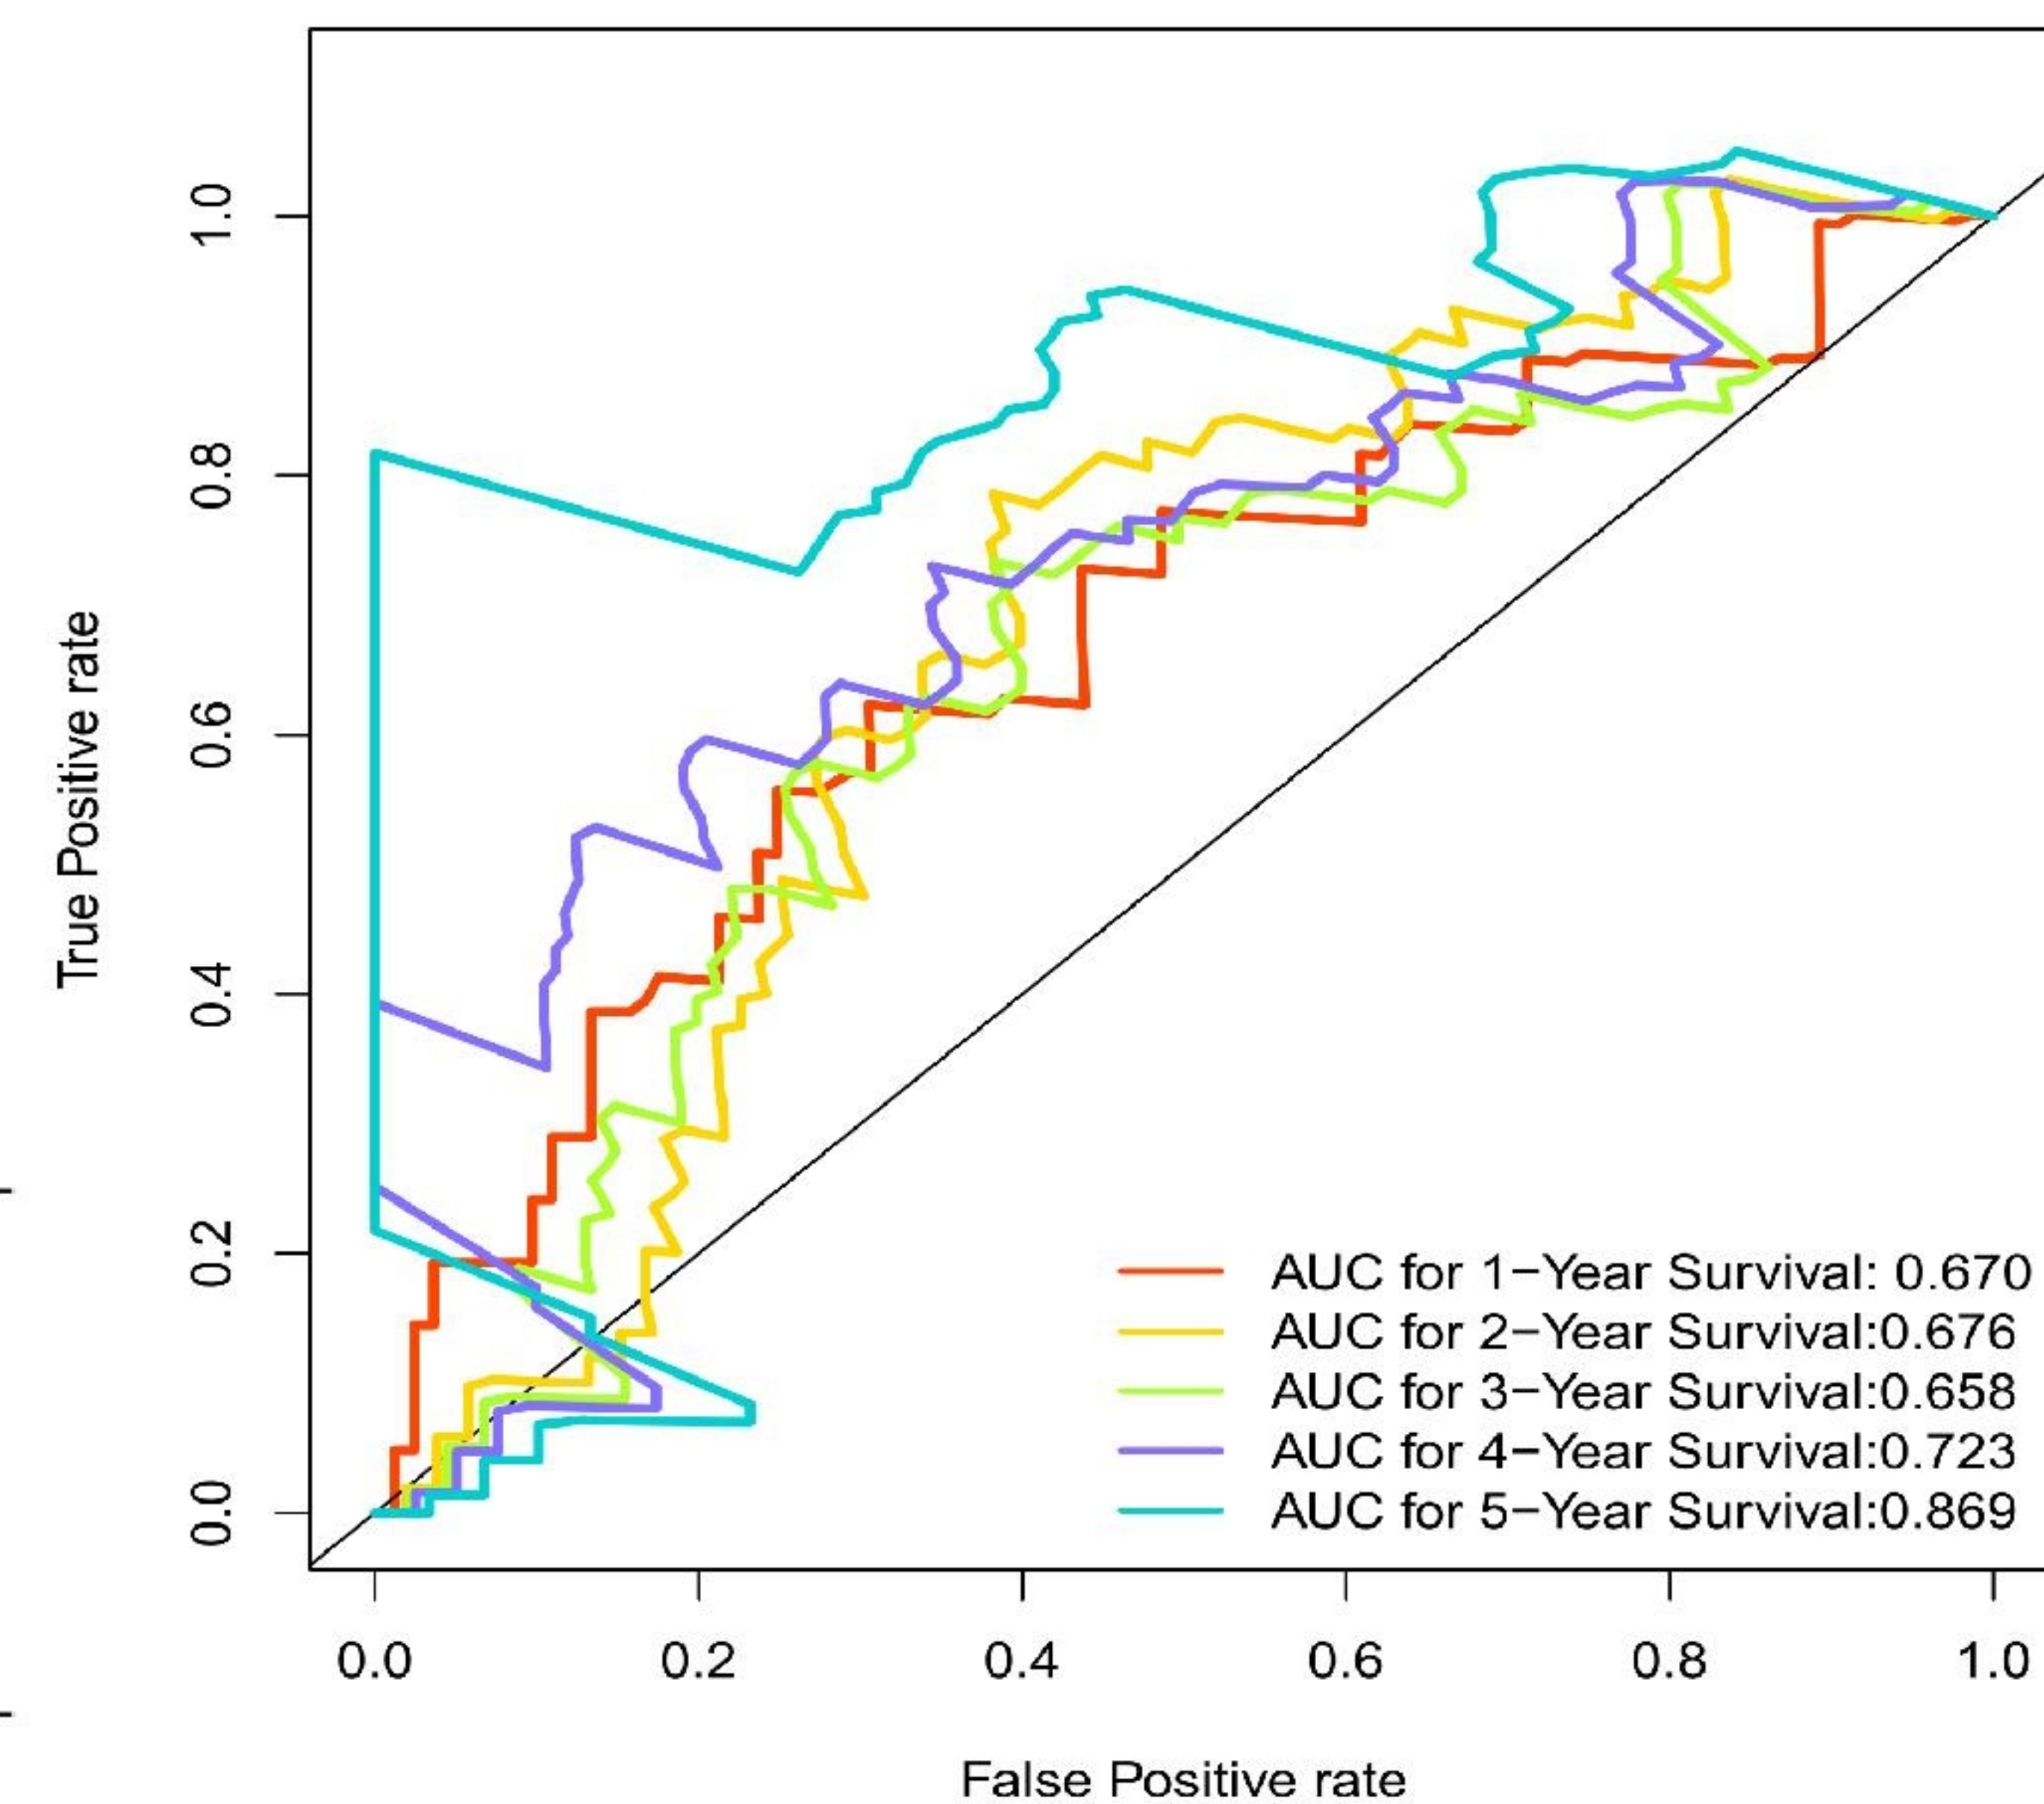

Test set Survival curve

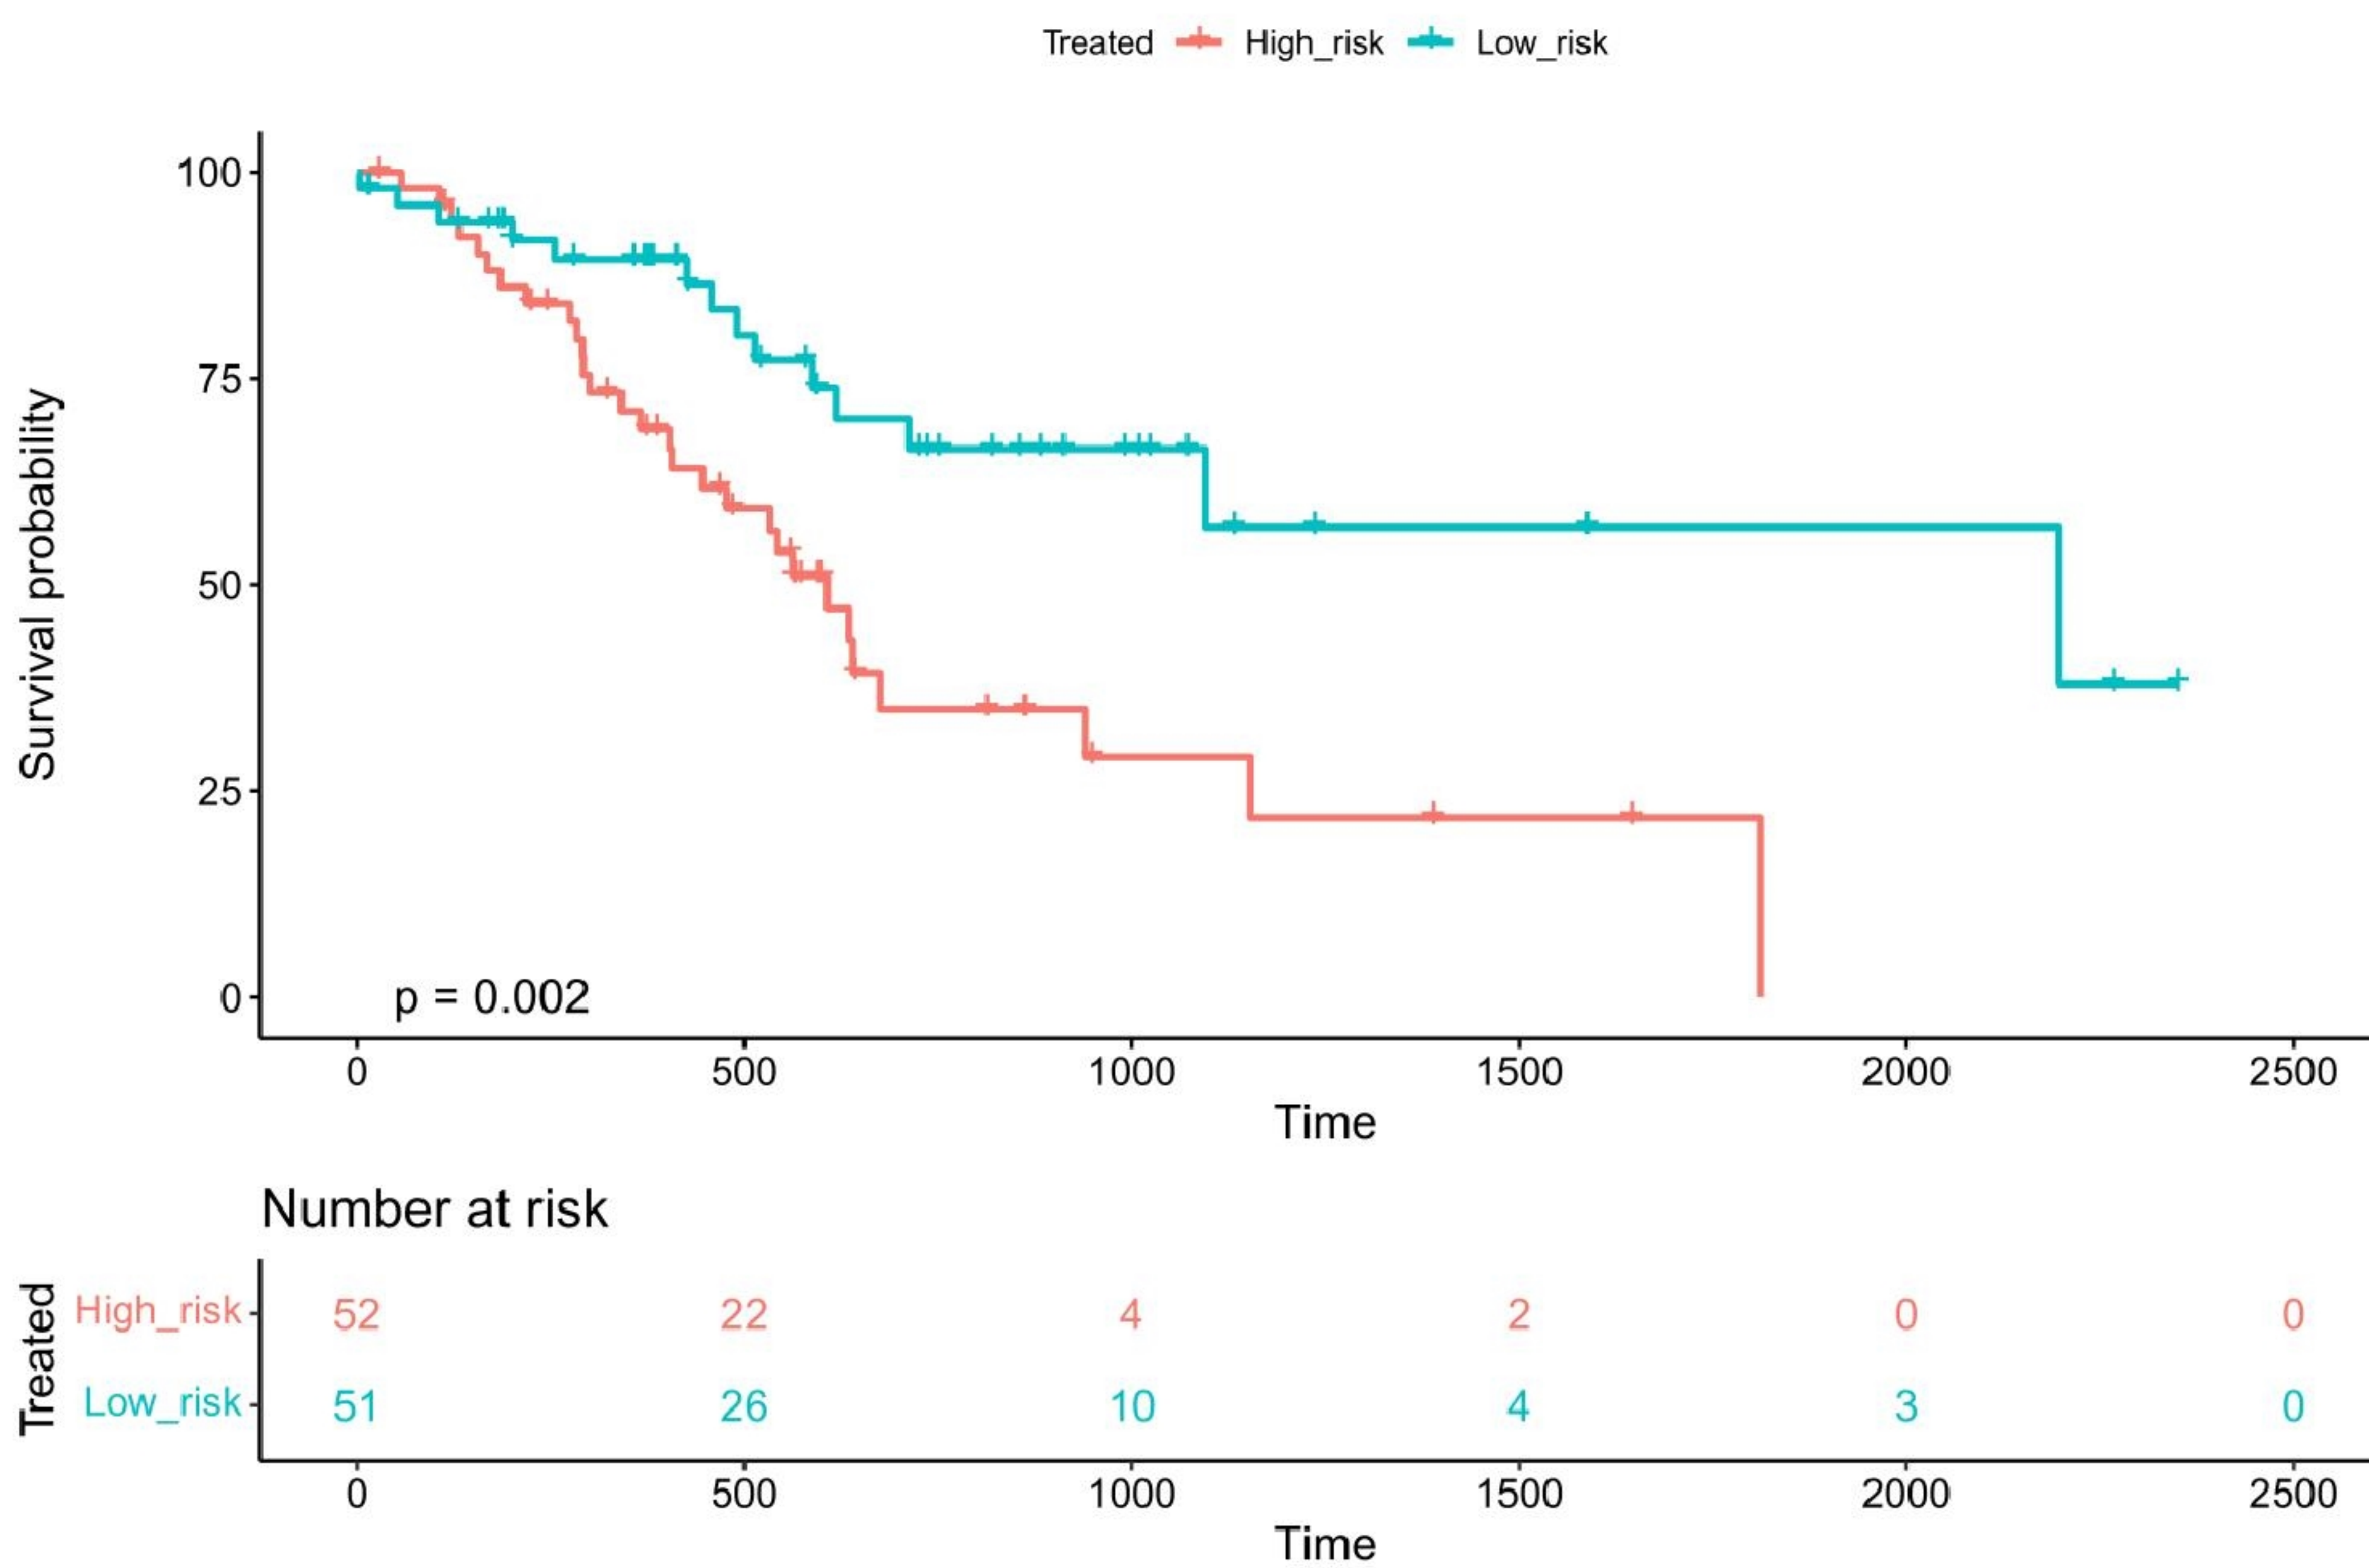

SurvivalROC for Validation set

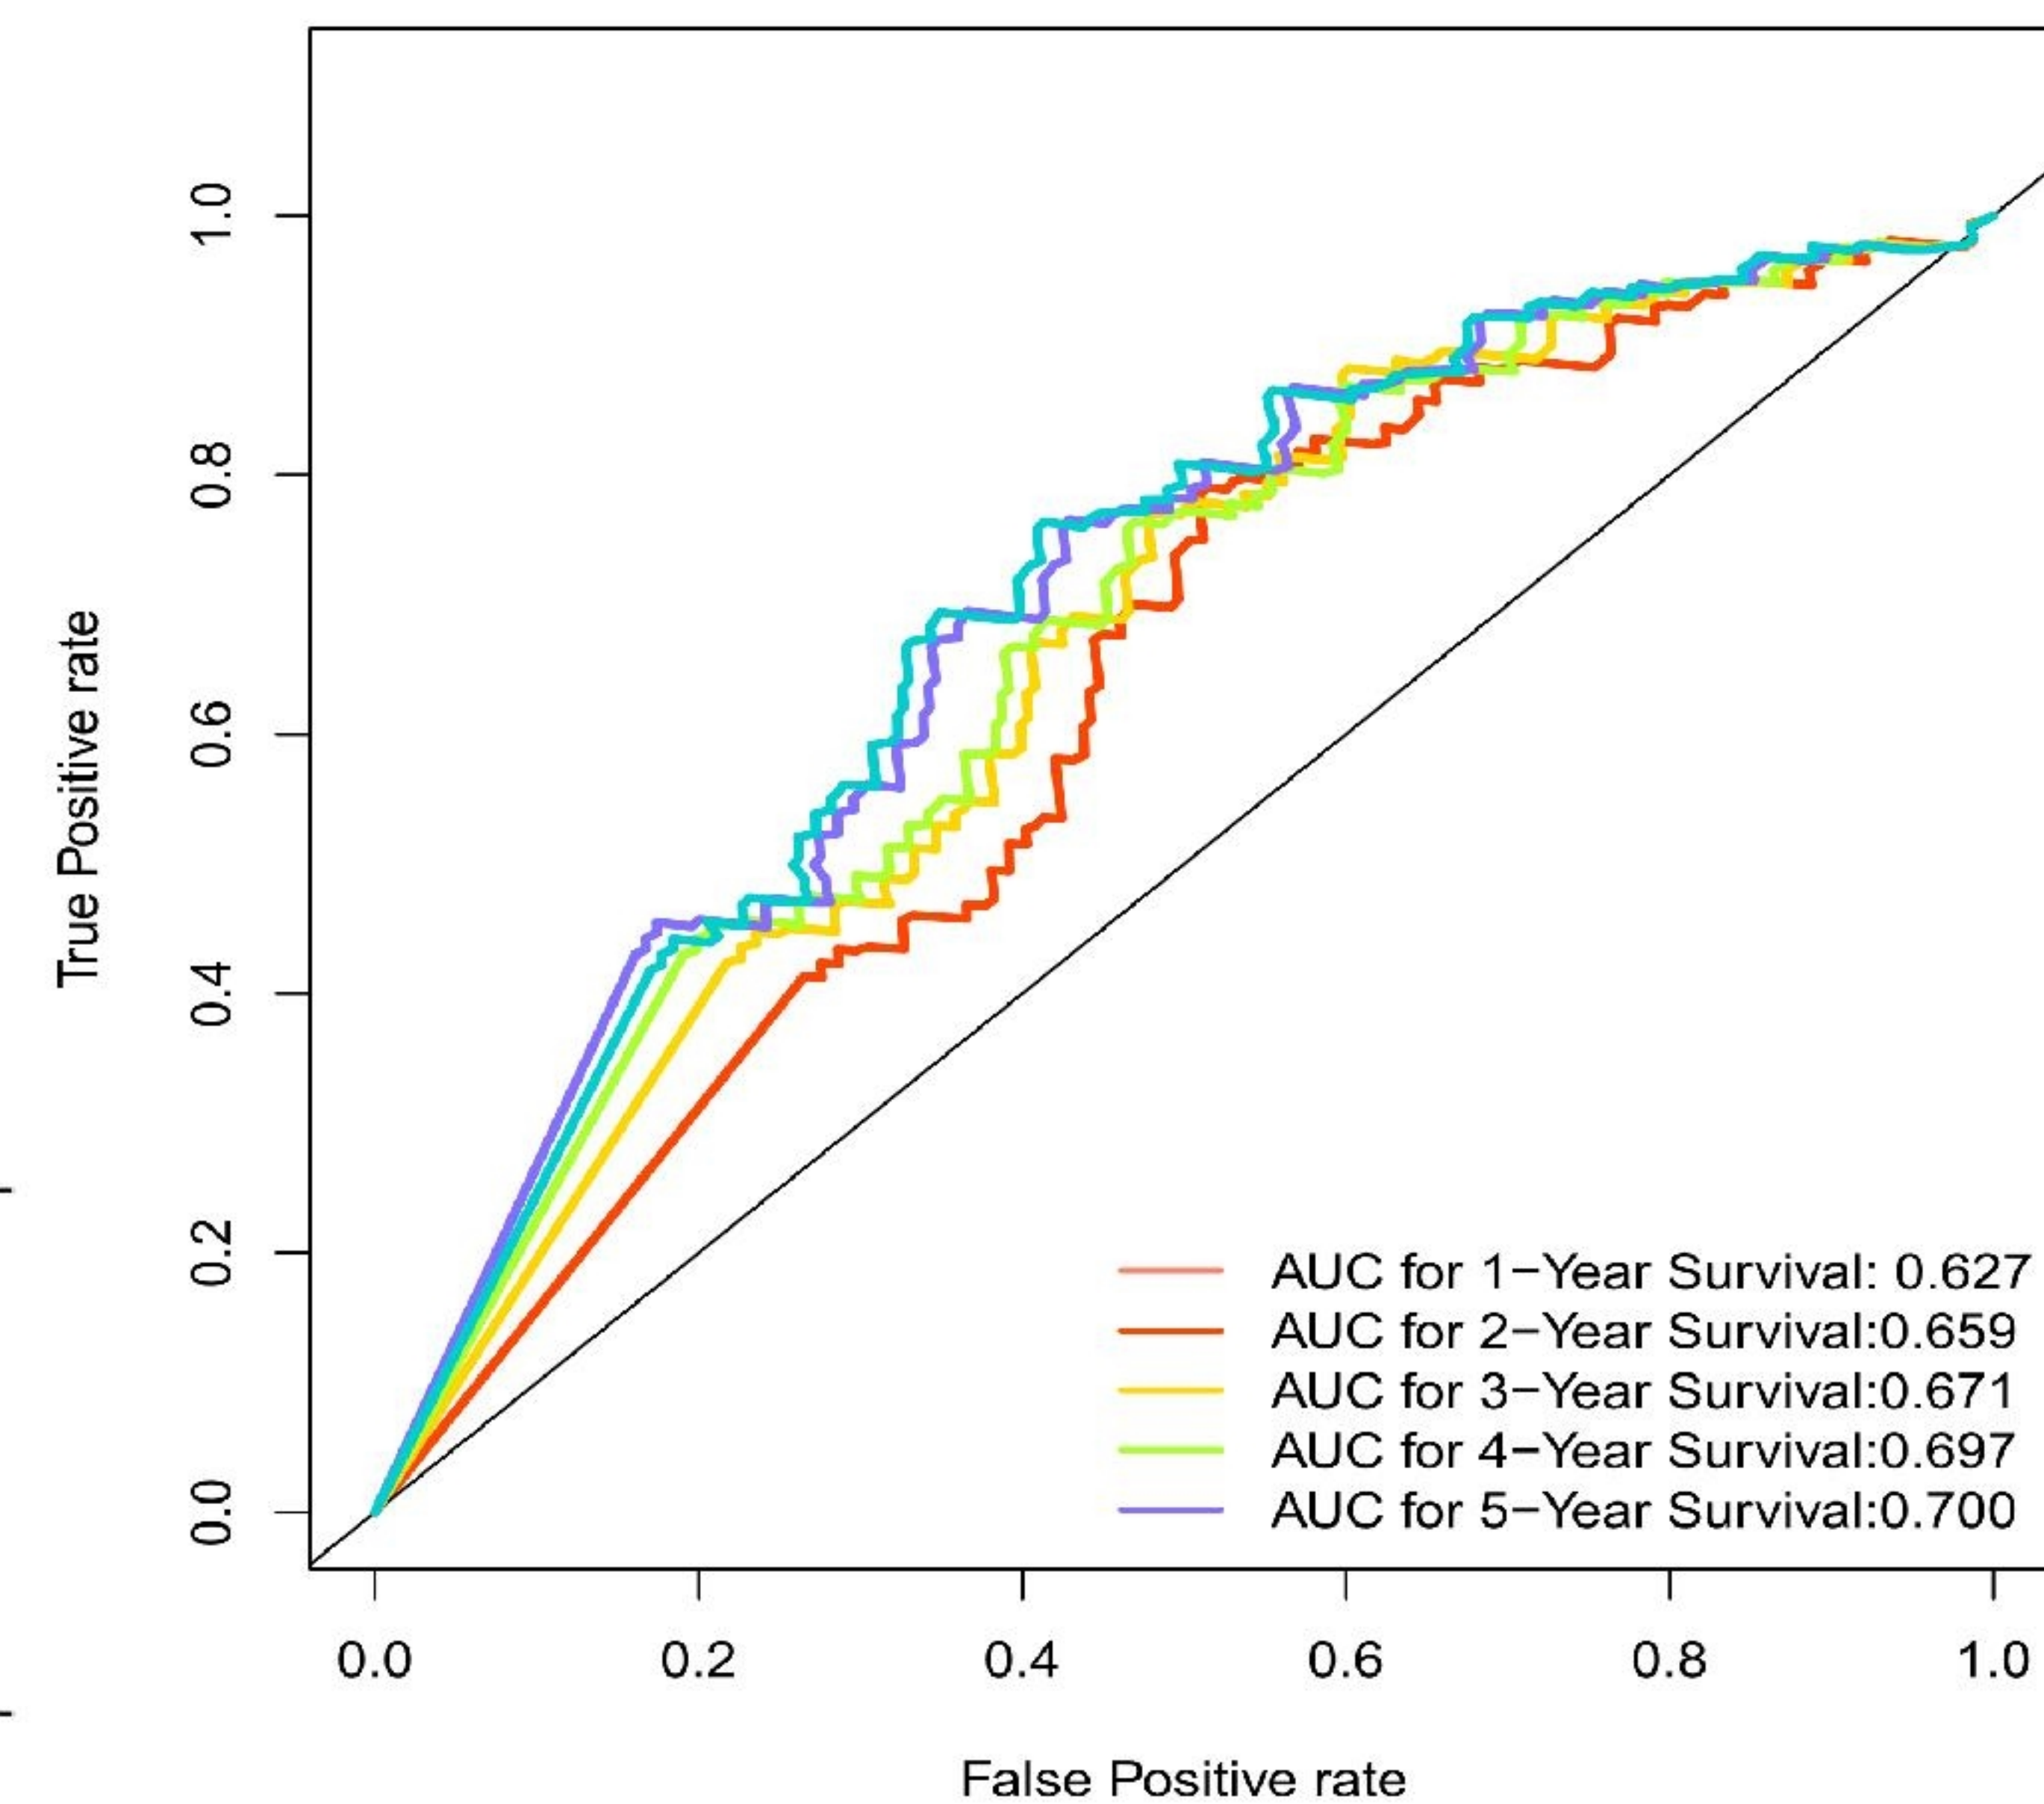

Supplement: f1 [file 9931419.f1.zip]
