# Supplementary figures and images for: Identification and Validation of a m5C RNA Modification-Related Gene Signature for Predicting Prognosis and Immunotherapeutic Efficiency of Gastric Cancer
Source: Hindawi journal article supplement (doi:10.1155/2023/9931419), 2023-03-08

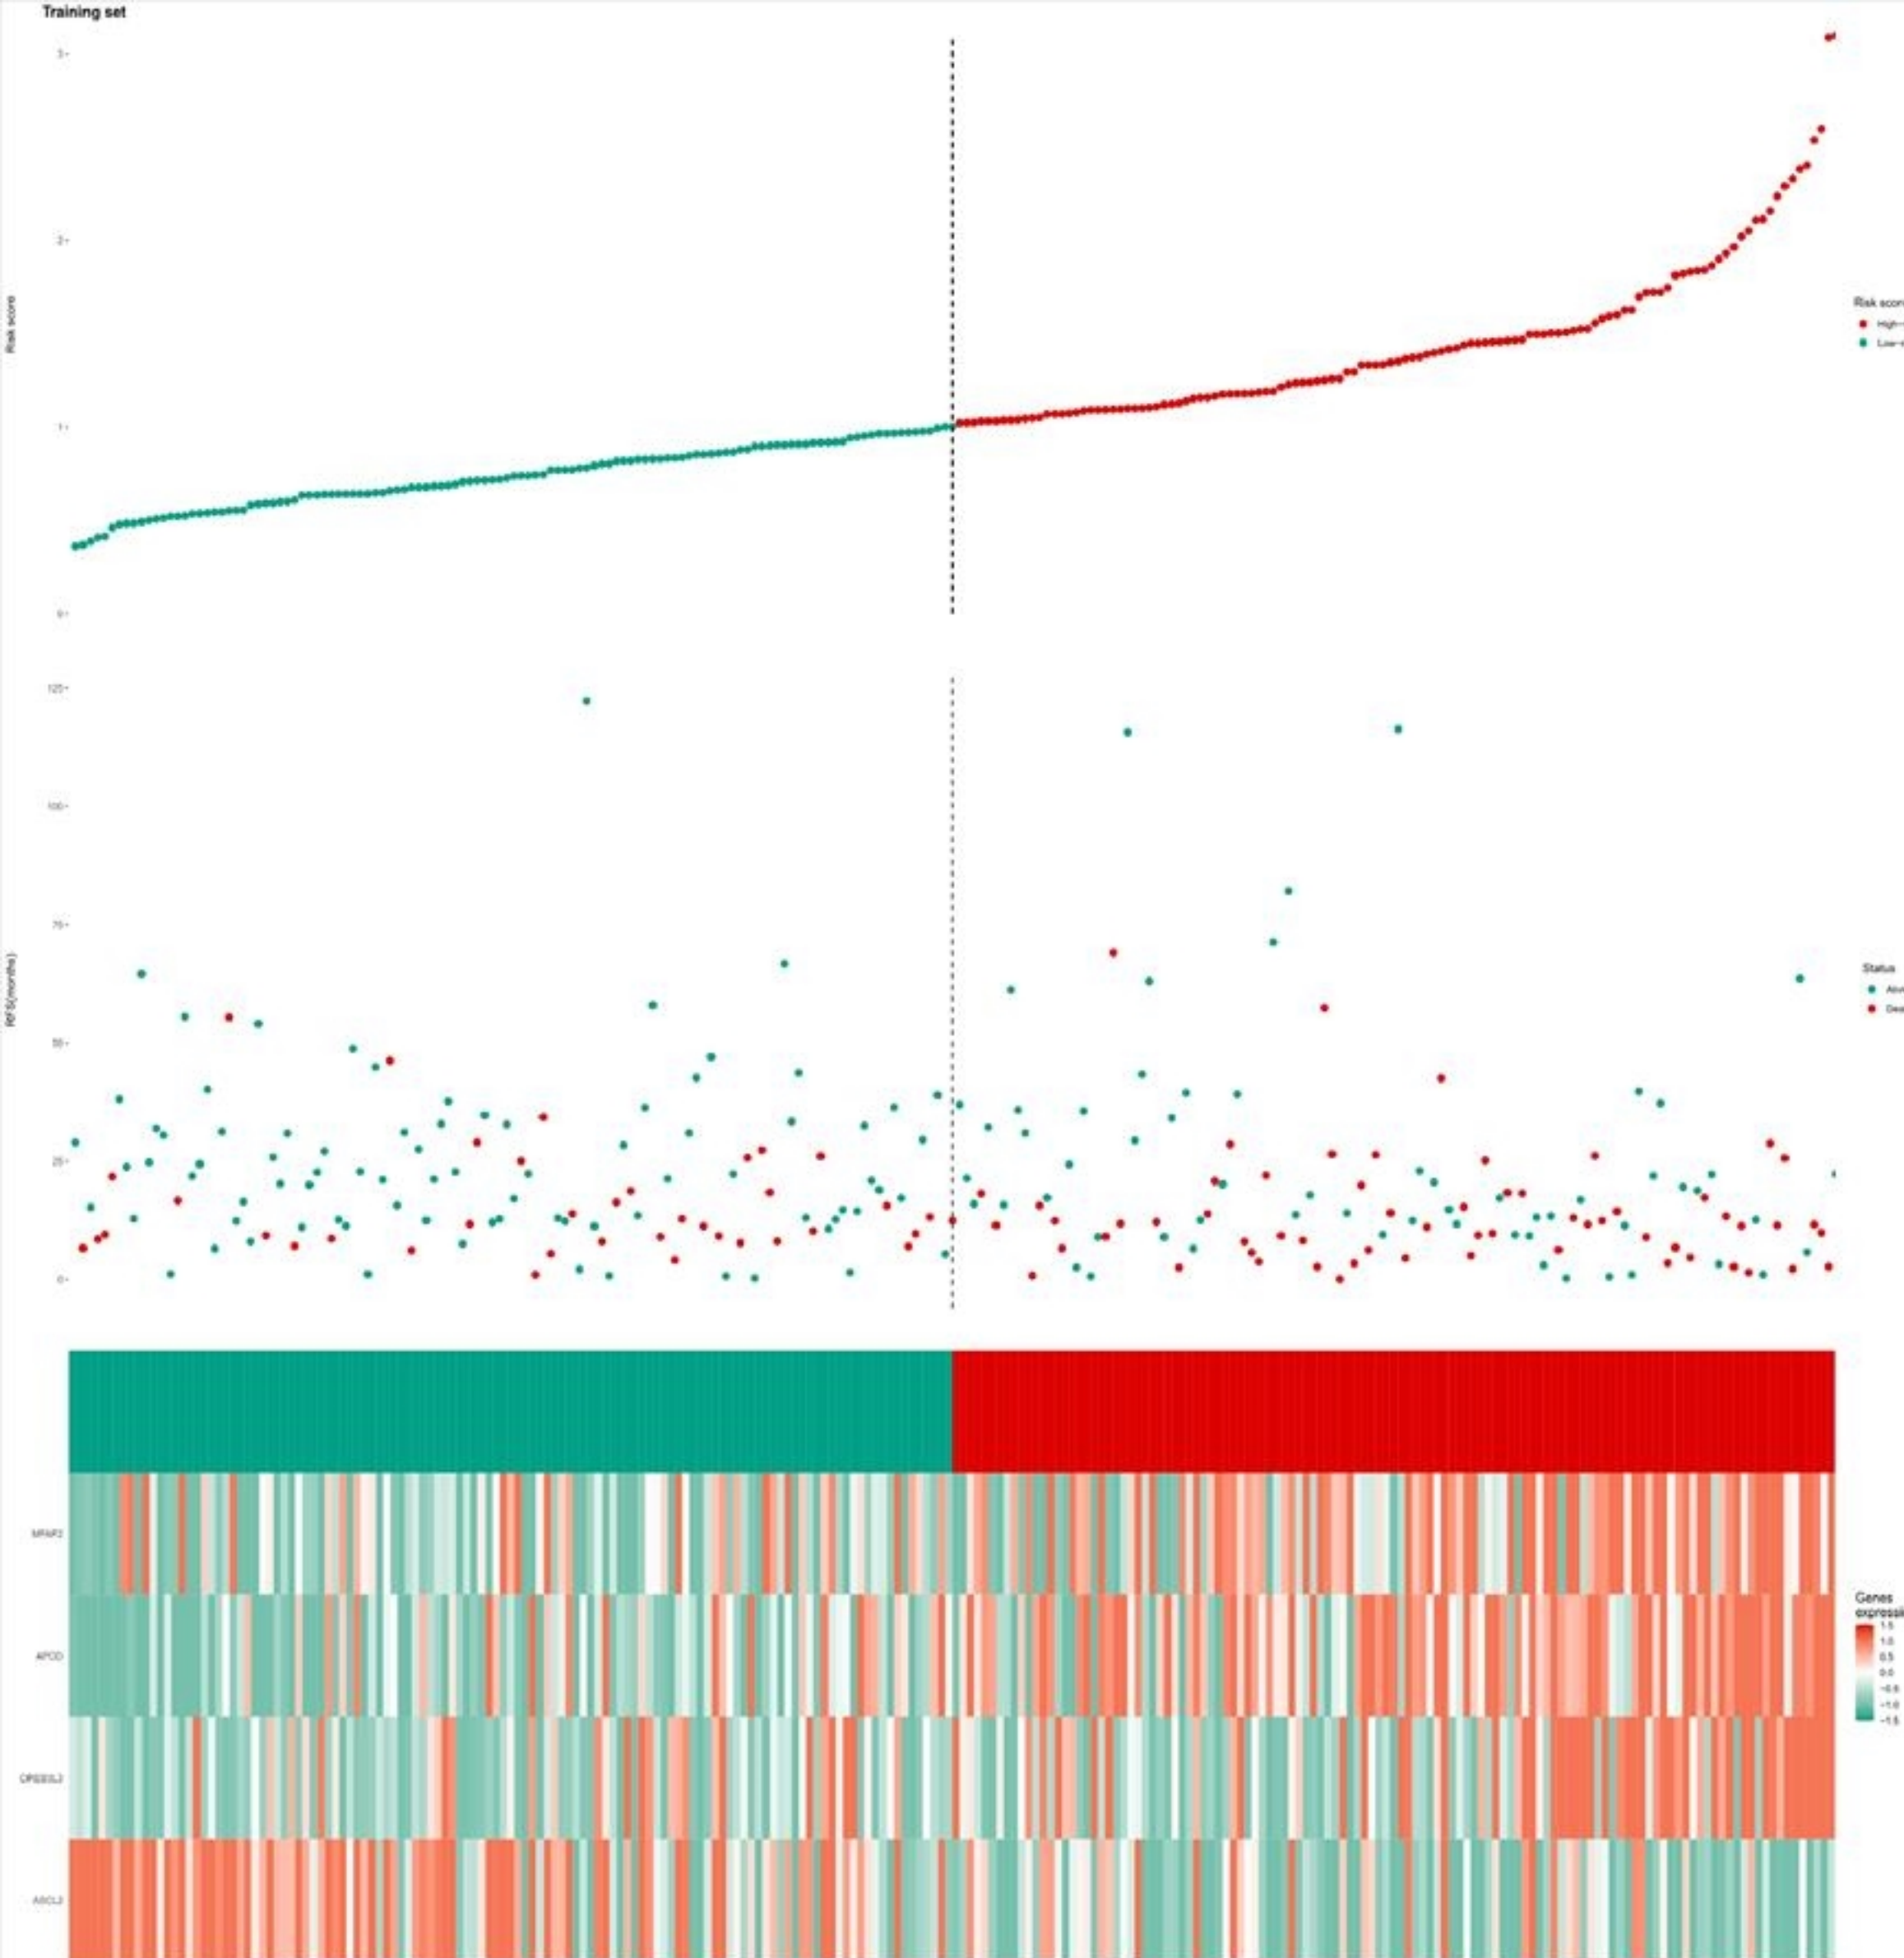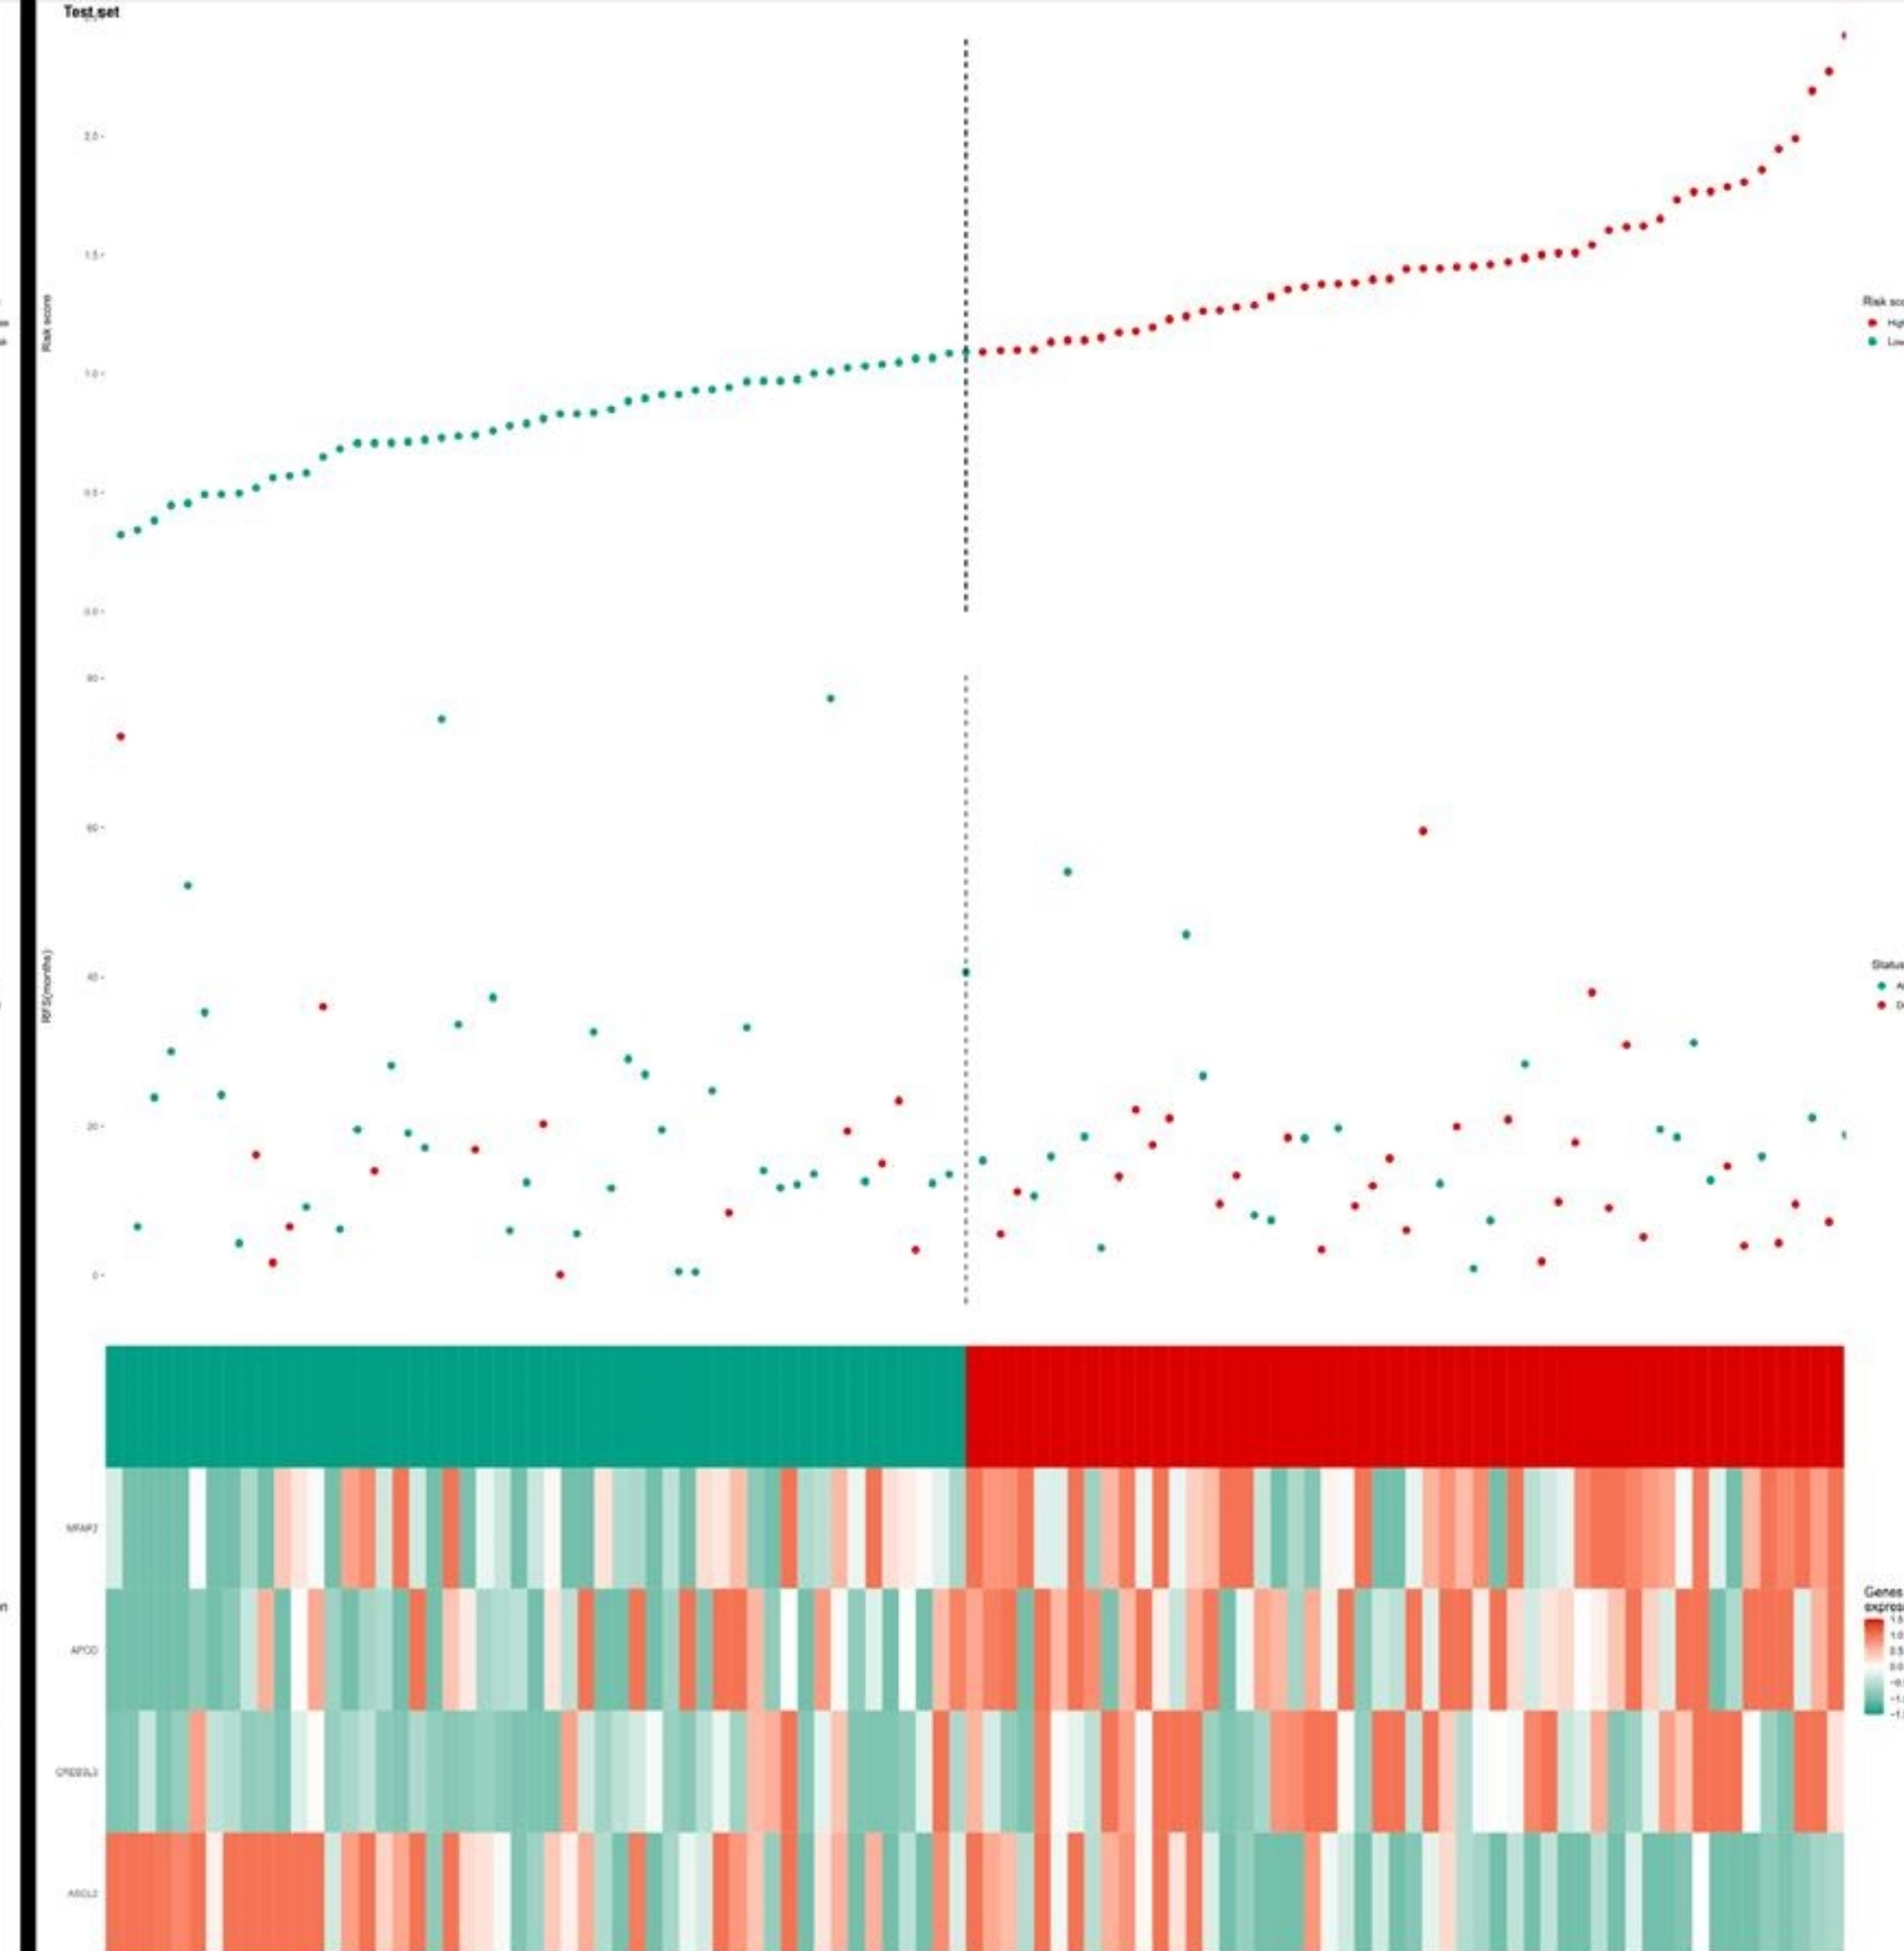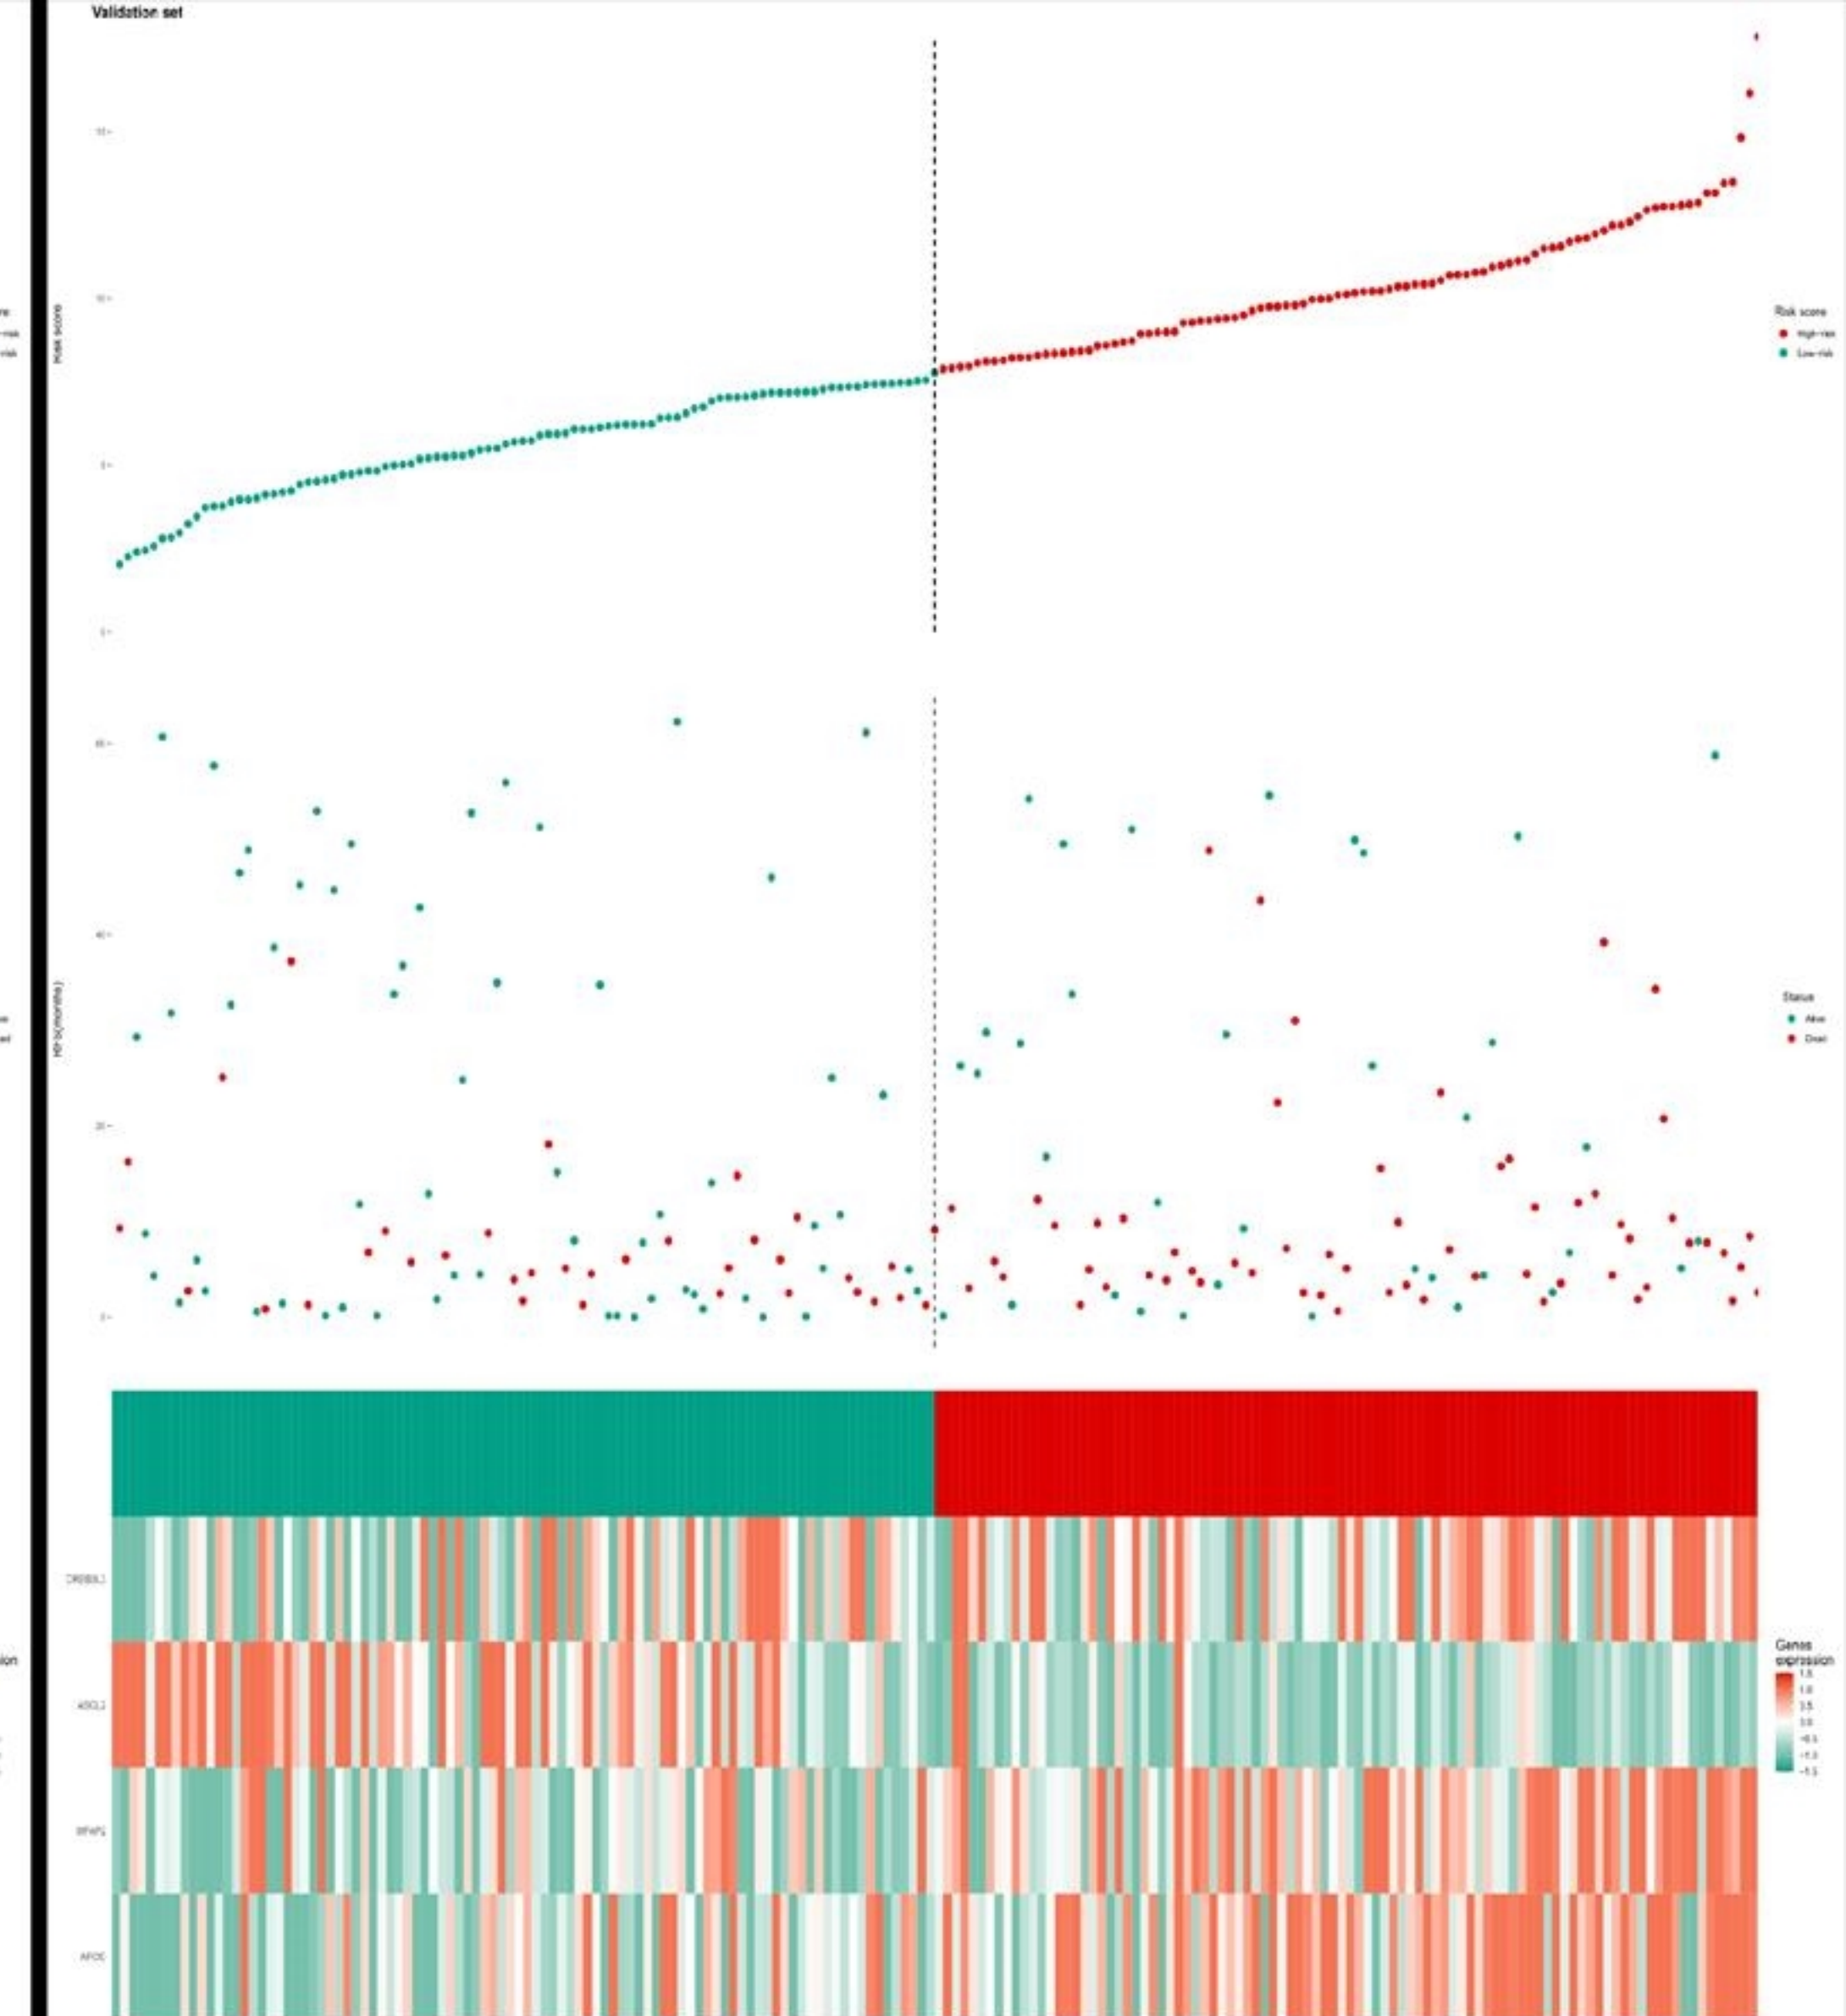

Supplement: f1 [file 9931419.f1.zip]

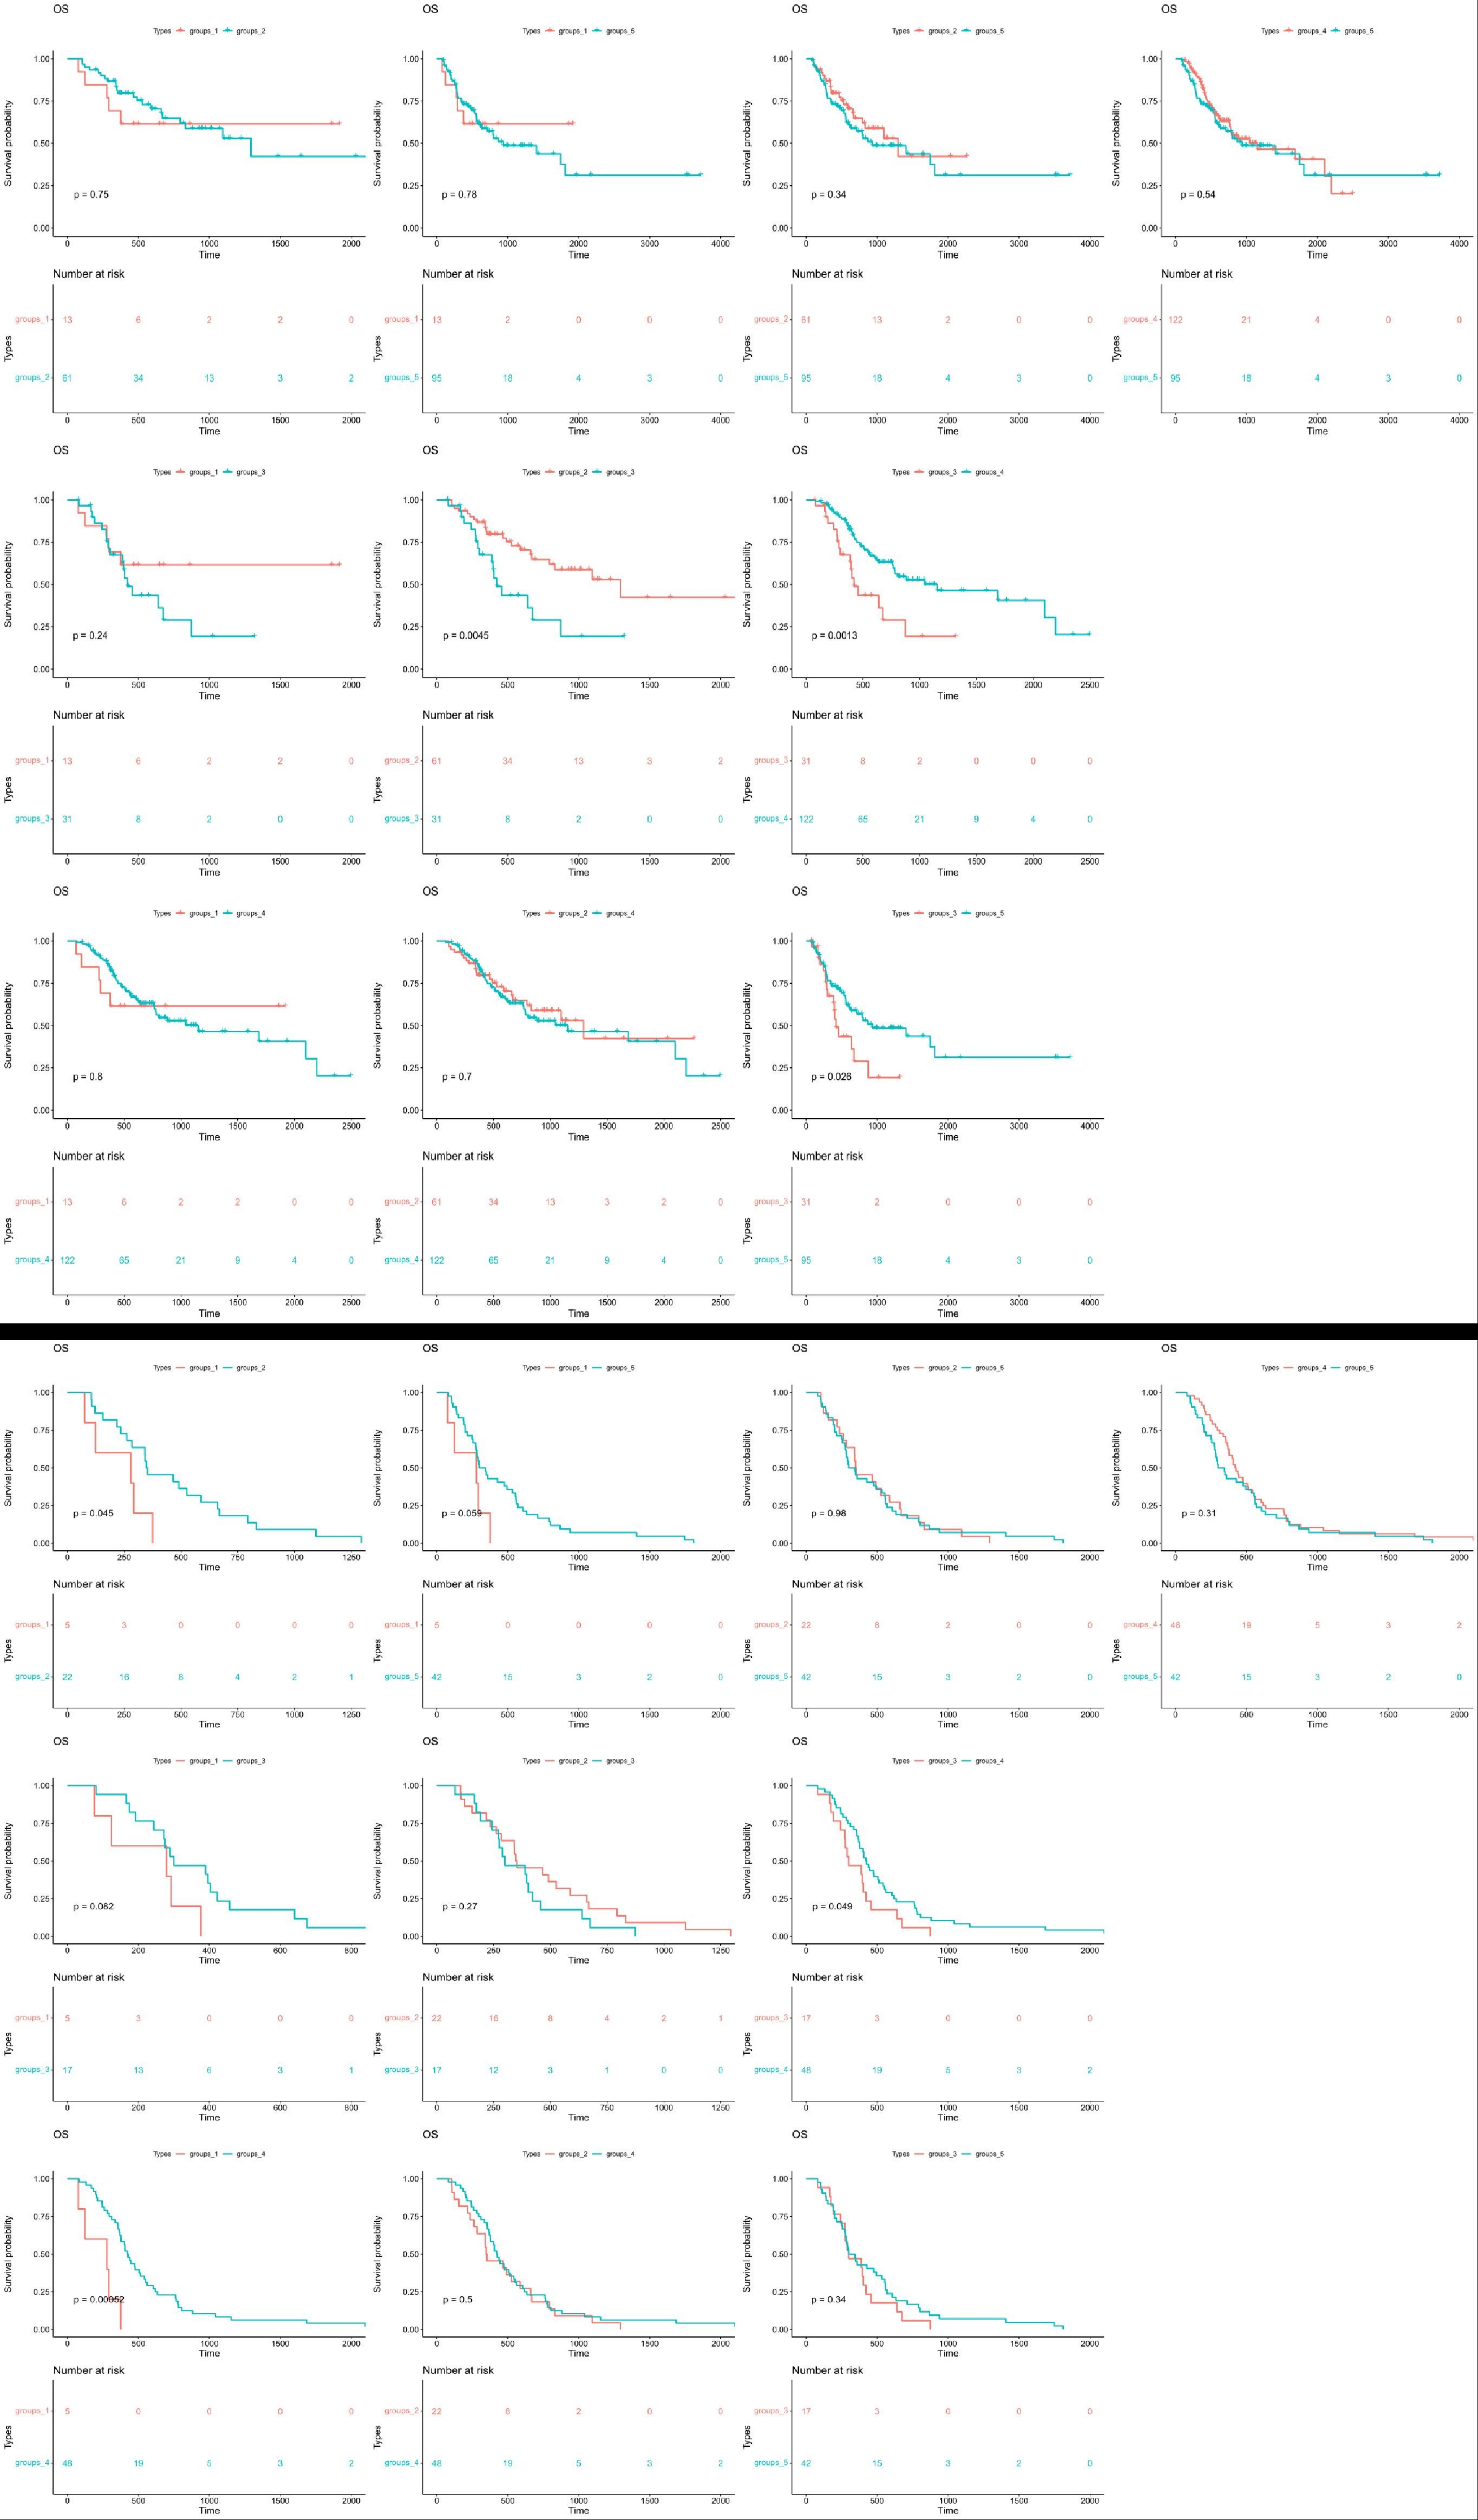

Supplement: f1 [file 9931419.f1.zip]

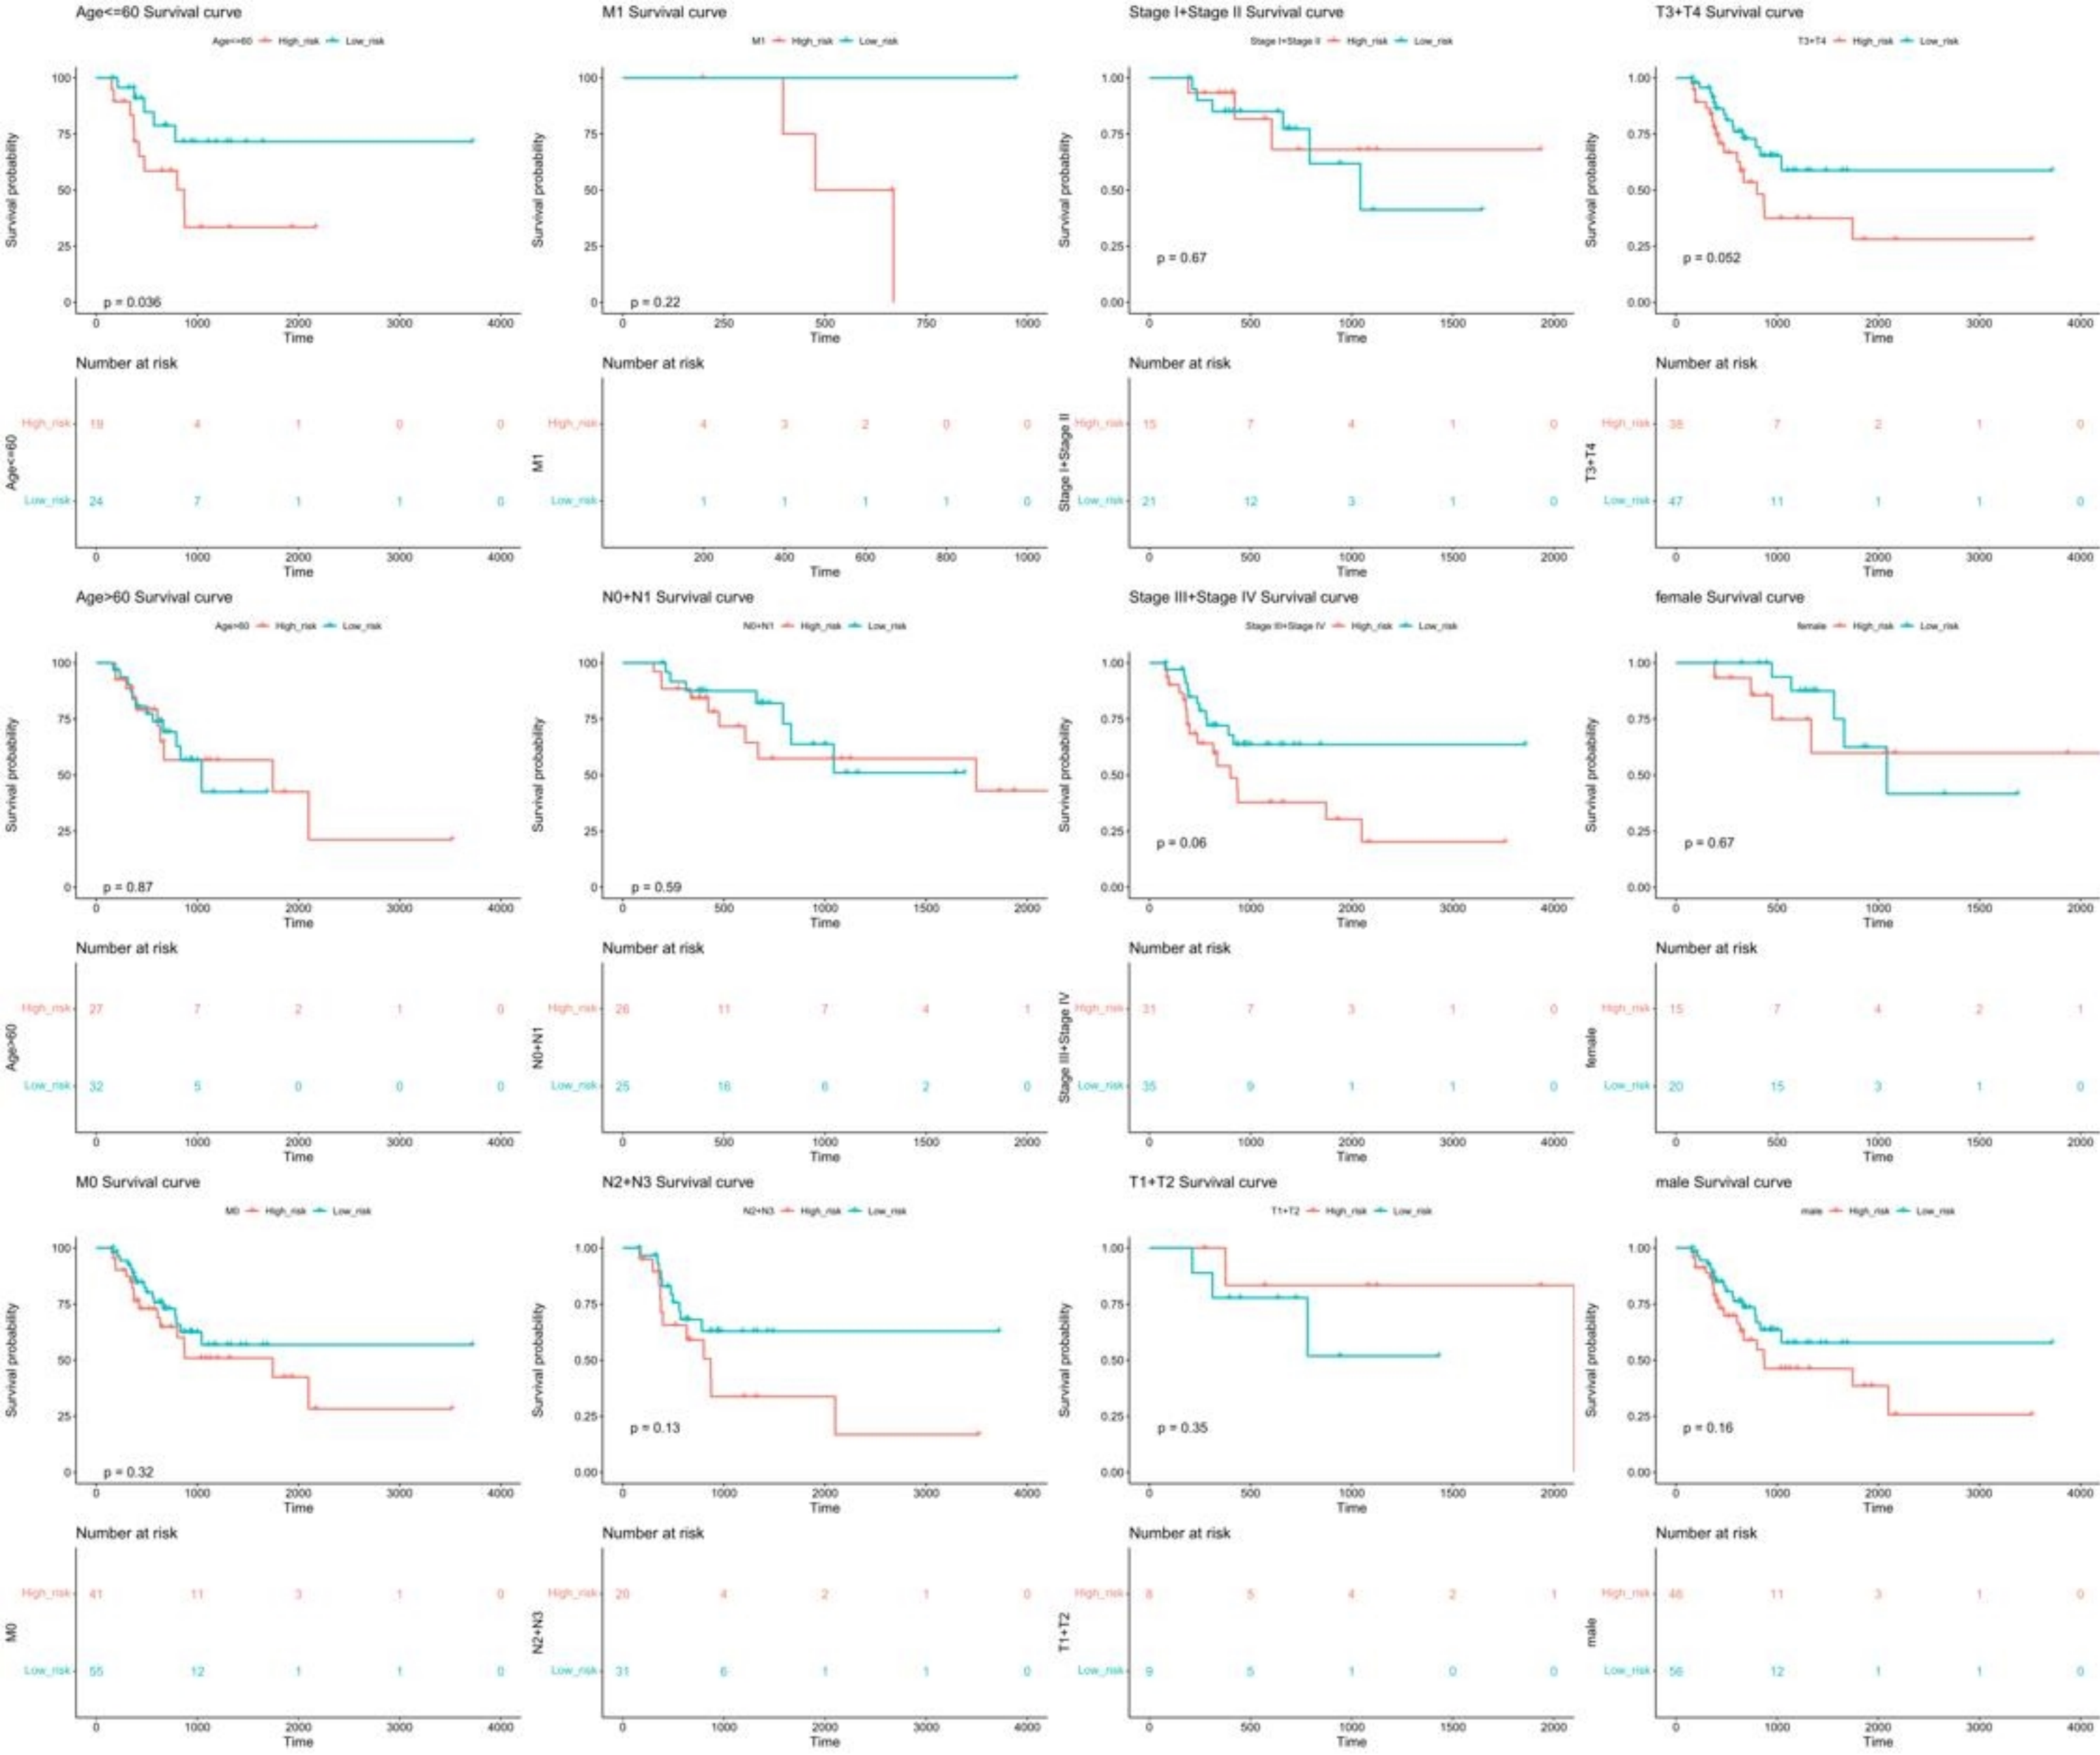

Supplement: f1 [file 9931419.f1.zip]

# NMF rank survey

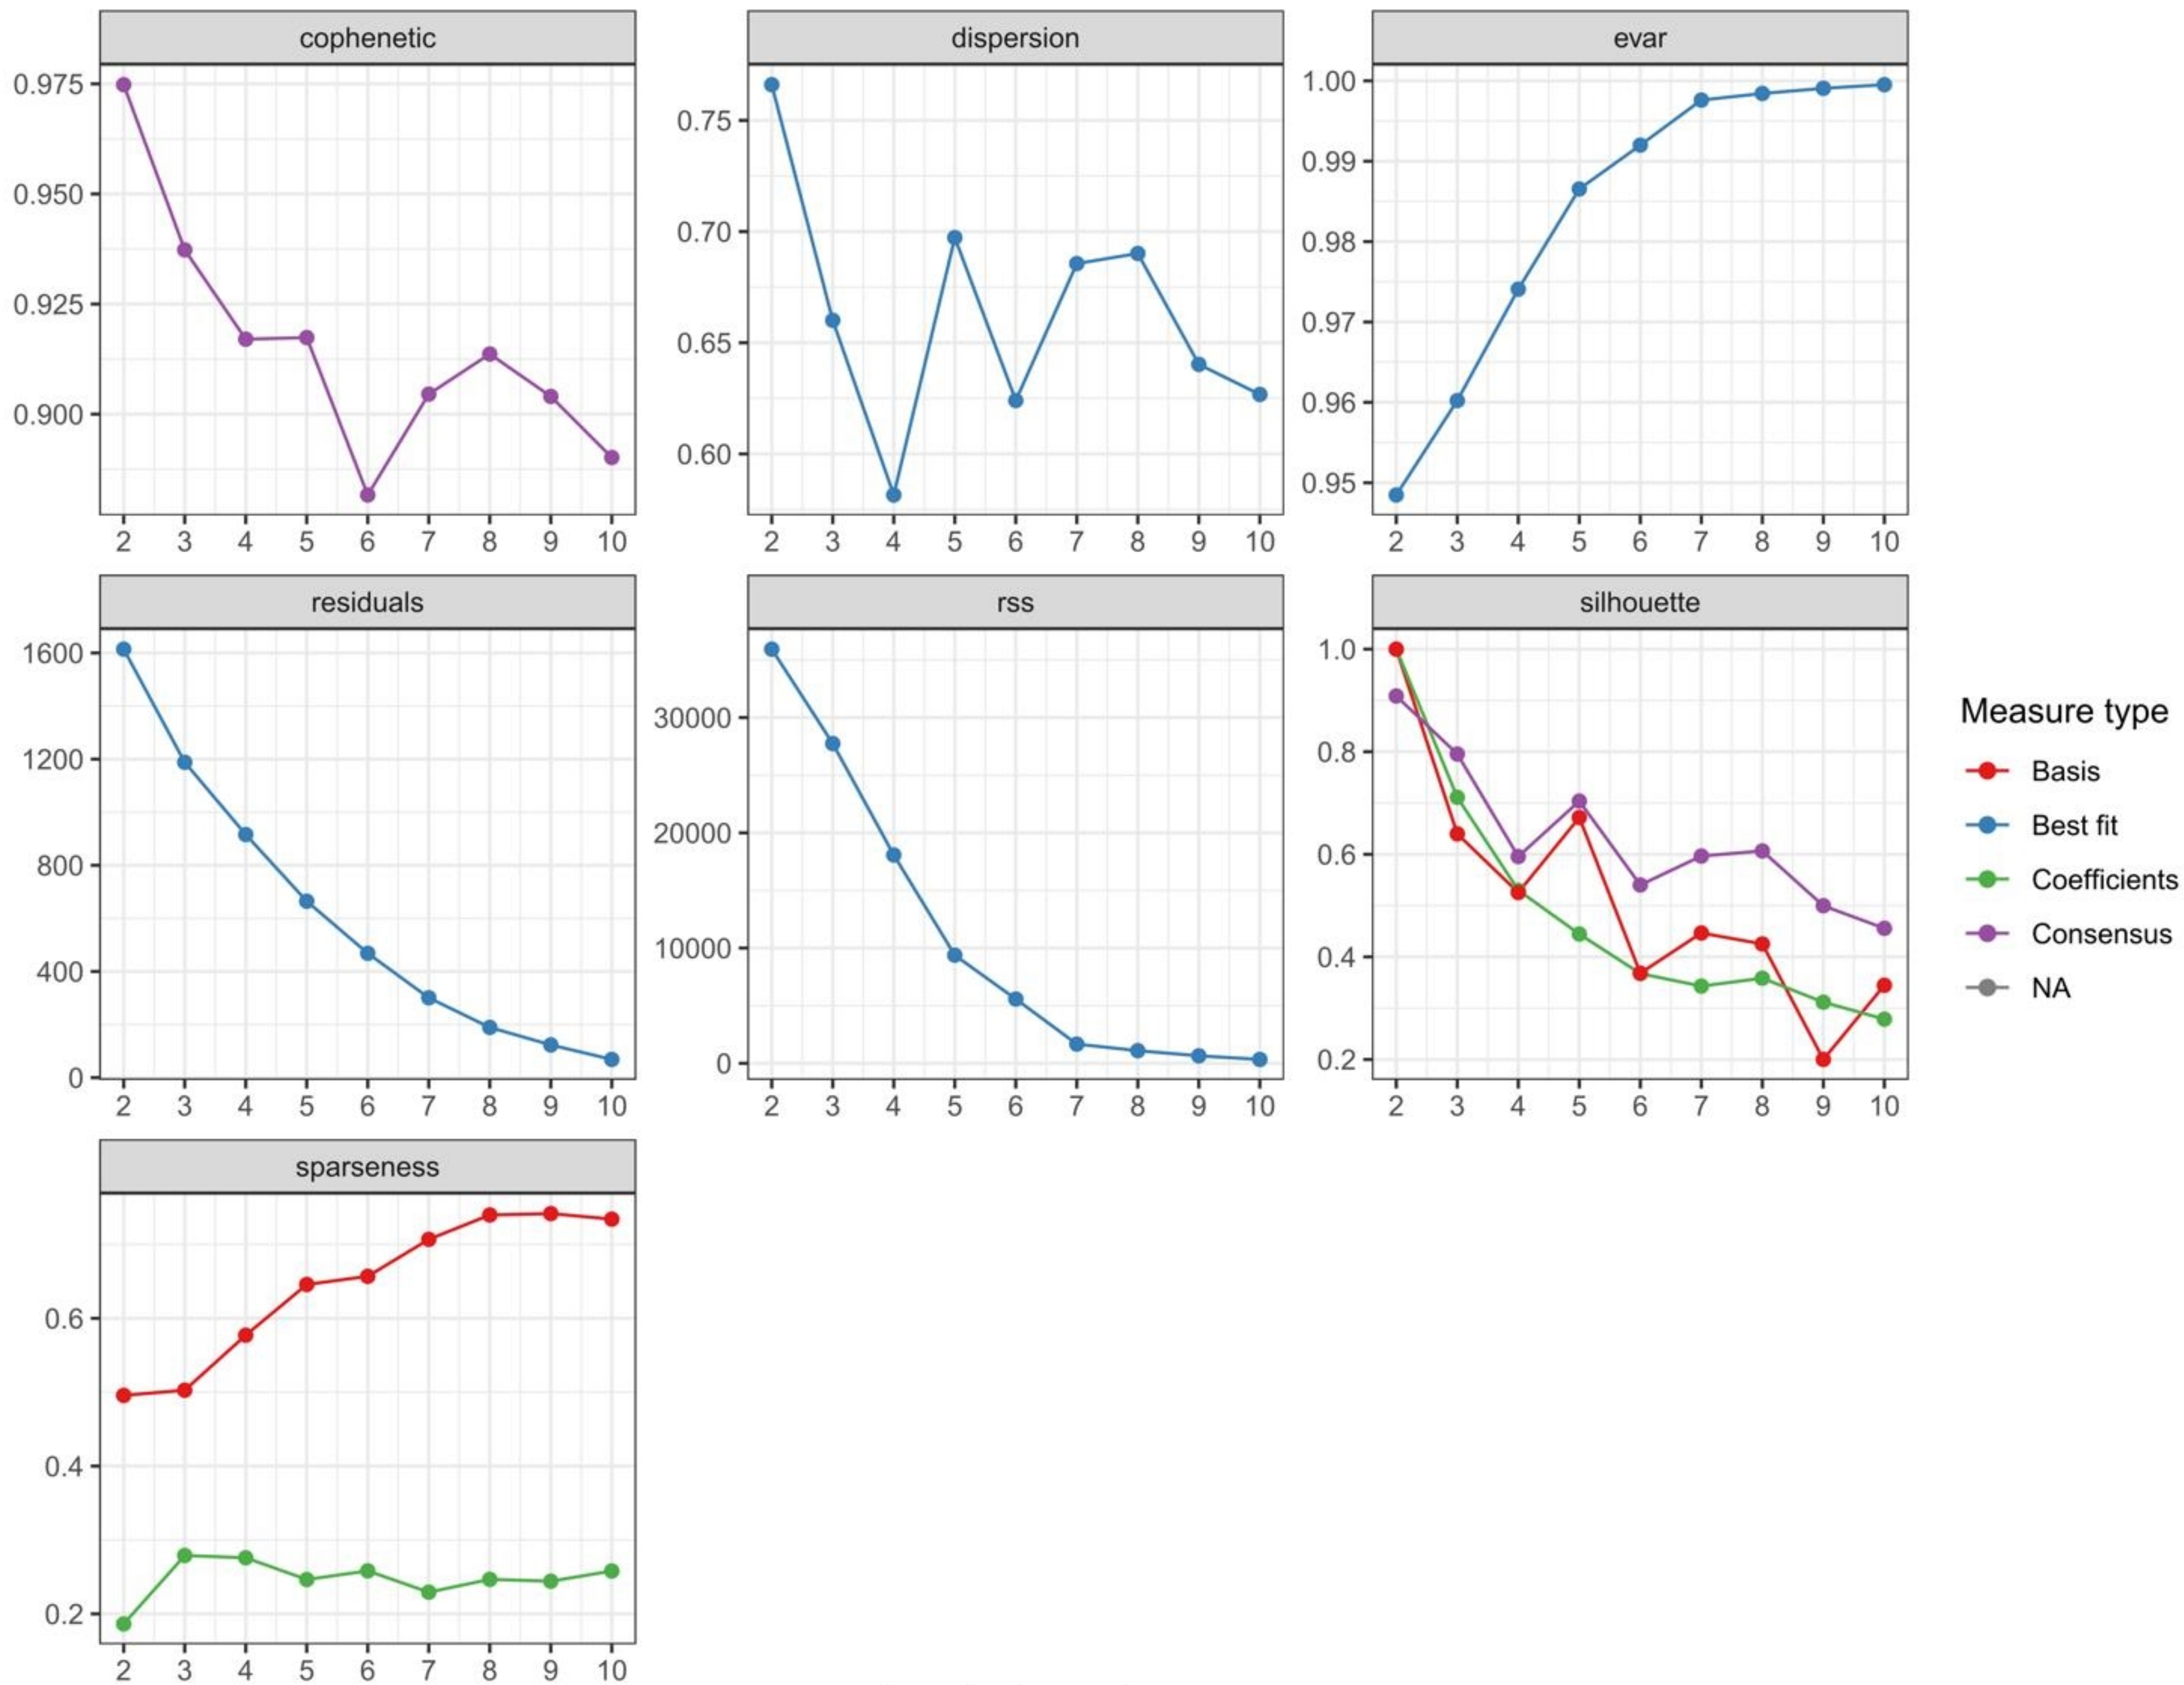

Factorization rank

Supplement: f1 [file 9931419.f1.zip]
